# Supplementary material for: Genetically Determined Uric Acid and the Risk of Cardiovascular and Neurovascular Diseases: A Mendelian Randomization Study of Outcomes Investigated in Randomized Trials
Source: PubMed Central journal article supplement — J Am Heart Assoc. 2019 Aug 23;8(17):e012738. doi: 10.1161/JAHA.119.012738 (PMC6755826; doi:10.1161/jaha.119.012738), 2019-08-23
Supplement: JAH3-8-e012738-s001.pdf [file JAH3-8-e012738-s001.pdf]

# **SUPPLEMENTAL MATERIAL**

**Table S1. All 28 SNPs for serum urate from Köttgen et al study (1)**

|    | SNP        | chr | EA | OA | EAF   | GX     | SE_GX | pval      | N       | MAF  | R2         | F-statistic |
|----|------------|-----|----|----|-------|--------|-------|-----------|---------|------|------------|-------------|
| 1  | rs10480300 | 7   | T  | C  | 0.280 | 0.035  | 0.006 | 4.10E-09  | 110,347 | 0.28 | 0.00030828 | 34.016363   |
| 2  | rs10821905 | 10  | A  | G  | 0.180 | 0.057  | 0.007 | 7.40E-17  | 110,347 | 0.18 | 0.00060053 | 66.2645023  |
| 3  | rs11264341 | 1   | T  | C  | 0.430 | -0.050 | 0.006 | 6.20E-19  | 110,347 | 0.43 | 0.00062893 | 69.3988818  |
| 4  | rs1165151  | 6   | T  | G  | 0.470 | -0.091 | 0.005 | 7.00E-70  | 110,347 | 0.47 | 0.00299282 | 330.23968   |
| 5  | rs1171614  | 10  | T  | C  | 0.220 | -0.079 | 0.007 | 2.30E-28  | 110,347 | 0.22 | 0.00115291 | 127.217045  |
| 6  | rs1178977  | 7   | A  | G  | 0.810 | 0.047  | 0.007 | 1.20E-12  | 110,347 | 0.19 | 0.00040838 | 45.0619972  |
| 7  | rs12498742 | 4   | A  | G  | 0.770 | 0.373  | 0.006 | 1.00E-10  | 110,347 | 0.23 | 0.03383799 | 3733.81943  |
| 8  | rs1260326  | 2   | T  | C  | 0.410 | 0.074  | 0.005 | 1.20E-44  | 110,347 | 0.41 | 0.00198108 | 218.600121  |
| 9  | rs1394125  | 15  | A  | G  | 0.340 | 0.043  | 0.006 | 2.50E-13  | 110,347 | 0.34 | 0.00046523 | 51.3358205  |
| 10 | rs1471633  | 1   | A  | C  | 0.460 | 0.059  | 0.005 | 1.20E-29  | 110,347 | 0.46 | 0.00126025 | 139.060742  |
| 11 | rs17050272 | 2   | A  | G  | 0.430 | 0.035  | 0.006 | 1.60E-10  | 110,347 | 0.43 | 0.00030828 | 34.016363   |
| 12 | rs17632159 | 5   | C  | G  | 0.310 | -0.039 | 0.006 | 3.50E-11  | 110,347 | 0.31 | 0.00038274 | 42.2326812  |
| 13 | rs17786744 | 8   | A  | G  | 0.580 | -0.029 | 0.005 | 1.4E-08   | 110,347 | 0.42 | 0.00030476 | 33.6288335  |
| 14 | rs2078267  | 11  | T  | C  | 0.510 | -0.073 | 0.006 | 9.40E-38  | 110,347 | 0.49 | 0.00133968 | 147.825449  |
| 15 | rs2231142  | 4   | T  | G  | 0.110 | 0.217  | 0.009 | 1.00E-134 | 110,347 | 0.11 | 0.00524073 | 578.28328   |
| 16 | rs2941484  | 8   | T  | C  | 0.440 | 0.044  | 0.005 | 4.40E-17  | 110,347 | 0.44 | 0.00070129 | 77.3835879  |
| 17 | rs3741414  | 12  | T  | C  | 0.240 | -0.072 | 0.007 | 2.20E-25  | 110,347 | 0.24 | 0.00095784 | 105.69171   |
| 18 | rs478607   | 11  | A  | G  | 0.840 | -0.047 | 0.007 | 4.40E-11  | 110,347 | 0.16 | 0.00040838 | 45.0619972  |
| 19 | rs653178   | 12  | T  | C  | 0.510 | -0.035 | 0.005 | 7.20E-12  | 110,347 | 0.49 | 0.00044386 | 48.9769195  |
| 20 | rs6598541  | 15  | A  | G  | 0.360 | 0.043  | 0.006 | 4.80E-15  | 110,347 | 0.36 | 0.00046523 | 51.3358205  |
| 21 | rs675209   | 6   | T  | C  | 0.270 | 0.061  | 0.006 | 1.30E-23  | 110,347 | 0.27 | 0.00093582 | 103.261577  |
| 22 | rs6770152  | 3   | T  | G  | 0.580 | -0.044 | 0.005 | 2.60E-16  | 110,347 | 0.42 | 0.00070129 | 77.3835879  |
| 23 | rs7188445  | 16  | A  | G  | 0.330 | -0.032 | 0.005 | 1.60E-09  | 110,347 | 0.33 | 0.00037106 | 40.9436884  |

|    |           |    |   |   |       |        |       |          |         |      |            |            |
|----|-----------|----|---|---|-------|--------|-------|----------|---------|------|------------|------------|
| 24 | rs7193778 | 16 | T | C | 0.860 | -0.046 | 0.008 | 8.20E-10 | 110,347 | 0.14 | 0.00029953 | 33.0516981 |
| 25 | rs7224610 | 17 | A | C | 0.580 | -0.042 | 0.005 | 5.40E-17 | 110,347 | 0.42 | 0.00063903 | 70.512993  |
| 26 | rs729761  | 6  | T | G | 0.300 | -0.047 | 0.006 | 8.00E-16 | 110,347 | 0.3  | 0.00055577 | 61.3253415 |
| 27 | rs7953704 | 12 | A | G | 0.470 | -0.029 | 0.005 | 2.6E-08  | 110,347 | 0.47 | 0.00030476 | 33.6288335 |
| 28 | rs7976059 | 12 | T | G | 0.350 | 0.032  | 0.005 | 1.90E-09 | 110,347 | 0.35 | 0.00037106 | 40.9436884 |

SNP: each SNP's id; chr: chromosome; EA: effect allele; OA: other allele; EAF: effect allele frequency for GX; GX: beta for the SNP-urate relationship; SE\_GX: standard error of GX; pval: p-value of GX; N: sample size of the study from which each SNP was found; MAF: minor allele frequency; R2: % of variance in cognition explained by each SNP, calculated by:  $R2 = \frac{2 * GX^2 * MAF * (1 - MAF)}{2 * GX^2 * MAF * (1 - MAF) + SE\_GX^2 * 2 * N * MAF * (1 - MAF)}$ ; F-statistic: a measurement of instrument's strength, calculated by:  $F\text{-statistic} = \frac{R2 * (N - 2)}{1 - R2}$  (3)

**Table S2. The 7 SNPs that are only associated with serum urate or/and gout (1) after excluding the pleiotropic SNPs using Phenoscanner (4)**

|   | SNP        | chr | EA | OA | EAF  | GX     | SE_GX | pval     | R2         | F-statistic |
|---|------------|-----|----|----|------|--------|-------|----------|------------|-------------|
| 1 | rs12498742 | 4   | A  | G  | 0.77 | 0.373  | 0.006 | 1.00E-10 | 0.03383799 | 3733.81943  |
| 2 | rs1471633  | 1   | A  | C  | 0.46 | 0.059  | 0.005 | 1.20E-29 | 0.00126025 | 139.060742  |
| 3 | rs2078267  | 11  | T  | C  | 0.51 | -0.073 | 0.006 | 9.40E-38 | 0.00133968 | 147.825449  |
| 4 | rs2941484  | 8   | T  | C  | 0.44 | 0.044  | 0.005 | 4.40E-17 | 0.00070129 | 77.3835879  |
| 5 | rs6770152  | 3   | T  | G  | 0.58 | -0.044 | 0.005 | 2.60E-16 | 0.00070129 | 77.3835879  |
| 6 | rs7224610  | 17  | A  | C  | 0.58 | -0.042 | 0.005 | 5.40E-17 | 0.00063903 | 70.512993   |
| 7 | rs7976059  | 12  | T  | G  | 0.35 | 0.032  | 0.005 | 1.90E-09 | 0.00037106 | 40.9436884  |

SNP: each SNP's id; chr: chromosome; EA: effect allele; OA: other allele; EAF: effect allele frequency for GX; GX: beta for the SNP-urate relationship; SE\_GX: standard error of GX; pval: p-value of GX

**Table S3. Power calculations for all analyses using the 28 SNPs. The calculations were made using the mRnd power calculator (available at <http://cnsgenomics.com/shiny/mRnd/>) (5)**

| <b>CHD</b>                                      |                   |                                                                                   |                                                |                  |                               |                                 |
|-------------------------------------------------|-------------------|-----------------------------------------------------------------------------------|------------------------------------------------|------------------|-------------------------------|---------------------------------|
| % of variance in urate explained by the 28 SNPs | Type-I error rate | Sample size of the outcome dataset; CARDIoGRAMplusC4D 1000 Genomes-based GWAS (6) | Proportion of CAD cases                        |                  | minimum OR to have >80% power | maximum OR to have >80% power   |
| 0.058                                           | 0.05              | 184,305                                                                           | 0.33                                           |                  | 0.97                          | 1.04                            |
| <b>MI</b>                                       |                   |                                                                                   |                                                |                  |                               |                                 |
| % of variance in urate explained by the 28 SNPs | Type-I error rate | Sample size of the outcome dataset; CARDIoGRAMplusC4D 1000 Genomes-based GWAS (6) | Proportion of MI cases                         |                  | minimum OR to have >80% power | maximum OR to have >80% power   |
| 0.058                                           | 0.05              | 184,305                                                                           | 0.23                                           |                  | 0.96                          | 1.04                            |
| <b>COGNITION</b>                                |                   |                                                                                   |                                                |                  |                               |                                 |
| % of variance in urate explained by the 28 SNPs | Type-I error rate | Sample size of the outcome dataset; (Lee et al) (7)                               | $\beta$ OLS*                                   | $\sigma^2$ (x)** | $\sigma^2$ (y)***             | minimum beta to have >80% power |
| 0.058                                           | 0.05              | 257,841                                                                           | 0                                              | 2.25             | 1                             | 0.135                           |
| <b>SBP</b>                                      |                   |                                                                                   |                                                |                  |                               |                                 |
| % of variance in urate explained by the 28 SNPs | Type-I error rate | Sample size of the outcome dataset; SBP automated (UK biobank) (8)                | $\beta$ OLS*                                   | $\sigma^2$ (x)** | $\sigma^2$ (y)***             | minimum beta to have >80% power |
| 0.058                                           | 0.05              | 473,891                                                                           | 0                                              | 2.25             | 1                             | 0.096                           |
| <b>ALZHEIMER</b>                                |                   |                                                                                   |                                                |                  |                               |                                 |
| % of variance in urate explained by the 28 SNPs | Type-I error rate | Sample size of the outcome dataset; IGAP 1st stage (9)                            | Proportion of Alzheimer cases                  |                  | minimum OR to have >80% power | maximum OR to have >80% power   |
| 0.058                                           | 0.05              | 54,162                                                                            | 0.31                                           |                  | 0.93                          | 1.08                            |
| <b>STROKE</b>                                   |                   |                                                                                   |                                                |                  |                               |                                 |
| % of variance in urate explained by the 28 SNPs | Type-I error rate | Sample size of the outcome dataset; MEGASTROKE (10)                               | Proportion of <b>any ischemic stroke</b> cases |                  | minimum OR to have >80% power | maximum OR to have >80% power   |

|                                                 |                   |                                                     |                                       |                               |                               |
|-------------------------------------------------|-------------------|-----------------------------------------------------|---------------------------------------|-------------------------------|-------------------------------|
| 0.058                                           | 0.05              | 514,791                                             | 0.12                                  | 0.97                          | 1.03                          |
| % of variance in urate explained by the 28 SNPs | Type-I error rate | Sample size of the outcome dataset; METASTROKE (10) | Proportion of <b>CES stroke</b> cases | minimum OR to have >80% power | maximum OR to have >80% power |
| 0.058                                           | 0.05              | 514,791                                             | 0.02                                  | 0.92                          | 1.08                          |
| % of variance in urate explained by the 28 SNPs | Type-I error rate | Sample size of the outcome dataset; METASTROKE (10) | Proportion of <b>LAS stroke</b> cases | minimum OR to have >80% power | maximum OR to have >80% power |
| 0.058                                           | 0.05              | 514,791                                             | 0.013                                 | 0.91                          | 1.10                          |
| % of variance in urate explained by the 28 SNPs | Type-I error rate | Sample size of the outcome dataset; METASTROKE (10) | Proportion of <b>SVS stroke</b> cases | minimum OR to have >80% power | maximum OR to have >80% power |
| 0.058                                           | 0.05              | 514,791                                             | 0.023                                 | 0.92                          | 1.07                          |

\* the observational association estimate of the exposure-outcome relationship

\*\* variance of the exposure variable (x),

\*\*\* variance of the outcome variable (y)

CHD; coronary heart disease, MI; myocardial infraction, SBP; systolic blood pressure, CES; cardioembolic stroke, LAS; large vessels stroke, SVS; small vessels stroke

**Table S4. Power calculations for all analyses using the 7 SNPs. The calculations were made using the mRnd power calculator (available at <http://cnsgenomics.com/shiny/mRnd/>) (5) .**

| <b>CHD</b>                                     |                   |                                                                                   |                                                |                  |                               |                                 |
|------------------------------------------------|-------------------|-----------------------------------------------------------------------------------|------------------------------------------------|------------------|-------------------------------|---------------------------------|
| % of variance in urate explained by the 7 SNPs | Type-I error rate | Sample size of the outcome dataset; CARDIoGRAMplusC4D 1000 Genomes-based GWAS (6) | Proportion of CAD cases                        |                  | minimum OR to have >80% power | maximum OR to have >80% power   |
| 0.039                                          | 0.05              | 184,305                                                                           | 0.33                                           |                  | 0.95                          | 1.05                            |
| <b>MI</b>                                      |                   |                                                                                   |                                                |                  |                               |                                 |
| % of variance in urate explained by the 7 SNPs | Type-I error rate | Sample size of the outcome dataset; CARDIoGRAMplusC4D 1000 Genomes-based GWAS (6) | Proportion of MI cases                         |                  | minimum OR to have >80% power | maximum OR to have >80% power   |
| 0.039                                          | 0.05              | 184,305                                                                           | 0.23                                           |                  | 0.95                          | 1.05                            |
| <b>COGNITION</b>                               |                   |                                                                                   |                                                |                  |                               |                                 |
| % of variance in urate explained by the 7 SNPs | Type-I error rate | Sample size of the outcome dataset; (Lee et al) (7)                               | $\beta$ OLS*                                   | $\sigma^2$ (x)** | $\sigma^2$ (y)***             | minimum beta to have >80% power |
| 0.039                                          | 0.05              | 257,841                                                                           | 0                                              | 2.25             | 1                             | 0.250                           |
| <b>SBP</b>                                     |                   |                                                                                   |                                                |                  |                               |                                 |
| % of variance in urate explained by the 7 SNPs | Type-I error rate | Sample size of the outcome dataset; SBP automated (UK biobank) (8)                | $\beta$ OLS*                                   | $\sigma^2$ (x)** | $\sigma^2$ (y)***             | minimum beta to have >80% power |
| 0.039                                          | 0.05              | 473,891                                                                           | 0                                              | 2.25             | 1                             | 0.193                           |
| <b>ALZHEIMER</b>                               |                   |                                                                                   |                                                |                  |                               |                                 |
| % of variance in urate explained by the 7 SNPs | Type-I error rate | Sample size of the outcome dataset; IGAP 1st stage (9)                            | Proportion of Alzheimer cases                  |                  | minimum OR to have >80% power | maximum OR to have >80% power   |
| 0.039                                          | 0.05              | 54,162                                                                            | 0.31                                           |                  | 0.91                          | 1.10                            |
| <b>STROKE</b>                                  |                   |                                                                                   |                                                |                  |                               |                                 |
| % of variance in urate explained by the 7 SNPs | Type-I error rate | Sample size of the outcome dataset; MEGASTROKE (10)                               | Proportion of <b>any ischemic stroke</b> cases |                  | minimum OR to have >80% power | maximum OR to have >80% power   |

|                                                |                   |                                                     |                                       |                               |                               |
|------------------------------------------------|-------------------|-----------------------------------------------------|---------------------------------------|-------------------------------|-------------------------------|
| 0.039                                          | 0.05              | 514,791                                             | 0.12                                  | 0.96                          | 1.04                          |
| % of variance in urate explained by the 7 SNPs | Type-I error rate | Sample size of the outcome dataset; METASTROKE (10) | Proportion of <b>CES stroke</b> cases | minimum OR to have >80% power | maximum OR to have >80% power |
| 0.039                                          | 0.05              | 514,791                                             | 0.02                                  | 0.90                          | 1.13                          |
| % of variance in urate explained by the 7 SNPs | Type-I error rate | Sample size of the outcome dataset; METASTROKE (10) | Proportion of <b>LAS stroke</b> cases | minimum OR to have >80% power | maximum OR to have >80% power |
| 0.039                                          | 0.05              | 514,791                                             | 0.013                                 | 0.88                          | 1.12                          |
| % of variance in urate explained by the 7 SNPs | Type-I error rate | Sample size of the outcome dataset; METASTROKE (10) | Proportion of <b>SVS stroke</b> cases | minimum OR to have >80% power | maximum OR to have >80% power |
| 0.039                                          | 0.05              | 514,791                                             | 0.023                                 | 0.90                          | 1.10                          |

\* the observational association estimate of the exposure-outcome relationship

\*\* variance of the exposure variable ( $x$ ),

\*\*\* variance of the outcome variable ( $y$ )

CHD; coronary heart disease, MI; myocardial infraction, SBP; systolic blood pressure, CES; cardioembolic stroke, LAS; large vessels stroke, SVS; small vessels stroke



**Table S5. The association estimates of the 28 SNPs for urate (1) with cognitive performance (7)**

|    | SNP        | chr | EA | OA | EAF   | GY     | SE_GY | pval  |
|----|------------|-----|----|----|-------|--------|-------|-------|
| 1  | rs10480300 | 7   | C  | T  | 0.704 | -0.001 | 0.003 | 0.780 |
| 2  | rs10821905 | 10  | A  | G  | 0.165 | -0.001 | 0.004 | 0.856 |
| 3  | rs11264341 | 1   | T  | C  | 0.412 | 0.000  | 0.003 | 0.878 |
| 4  | rs1165151  | 6   | G  | T  | 0.551 | -0.010 | 0.003 | 0.000 |
| 5  | rs1171614  | 10  | T  | C  | 0.257 | 0.007  | 0.003 | 0.038 |
| 6  | rs1178977  | 7   | G  | A  | 0.197 | -0.007 | 0.004 | 0.047 |
| 7  | rs12498742 | 4   | A  | G  | 0.779 | -0.011 | 0.003 | 0.001 |
| 8  | rs1260326  | 2   | C  | T  | 0.587 | -0.003 | 0.003 | 0.237 |
| 9  | rs1394125  | 15  | G  | A  | 0.645 | -0.001 | 0.003 | 0.639 |
| 10 | rs1471633  | 1   | C  | A  | 0.510 | 0.002  | 0.003 | 0.572 |
| 11 | rs17050272 | 2   | G  | A  | 0.563 | 0.002  | 0.003 | 0.437 |
| 12 | rs17632159 | 5   | G  | C  | 0.685 | -0.003 | 0.003 | 0.389 |
| 13 | rs17786744 | 8   | G  | A  | 0.439 | 0.003  | 0.003 | 0.348 |
| 14 | rs2078267  | 11  | C  | T  | 0.442 | 0.003  | 0.003 | 0.249 |
| 15 | rs2231142  | 4   | G  | T  | 0.893 | 0.001  | 0.005 | 0.886 |
| 16 | rs2941484  | 8   | T  | C  | 0.422 | -0.004 | 0.003 | 0.141 |
| 17 | rs3741414  | 12  | T  | C  | 0.221 | -0.010 | 0.003 | 0.002 |
| 18 | rs478607   | 11  | G  | A  | 0.136 | 0.008  | 0.004 | 0.045 |
| 19 | rs653178   | 12  | C  | T  | 0.473 | -0.006 | 0.003 | 0.044 |
| 20 | rs6598541  | 15  | G  | A  | 0.677 | -0.004 | 0.003 | 0.197 |
| 21 | rs675209   | 6   | C  | T  | 0.708 | 0.002  | 0.003 | 0.546 |
| 22 | rs6770152  | 3   | G  | T  | 0.444 | 0.013  | 0.003 | 0.000 |
| 23 | rs7188445  | 16  | A  | G  | 0.354 | 0.004  | 0.003 | 0.140 |
| 24 | rs7193778  | 16  | T  | C  | 0.855 | -0.009 | 0.004 | 0.032 |
| 25 | rs7224610  | 17  | A  | C  | 0.585 | 0.004  | 0.003 | 0.136 |
| 26 | rs729761   | 6   | T  | G  | 0.282 | -0.006 | 0.003 | 0.054 |
| 27 | rs7953704  | 12  | A  | G  | 0.481 | 0.003  | 0.003 | 0.272 |
| 28 | rs7976059  | 12  | G  | T  | 0.645 | 0.006  | 0.003 | 0.050 |

SNP: each SNP's id; chr: chromosome; EA: effect allele, OA: other allele; EAF: effect allele frequency for GY; GY: beta for the SNP-cognition relationship; SE\_GY: standard error of GY; pval: p-value of GY

**Table S6. The association estimates of the 28 SNPs for urate (1) with Alzheimer's disease (9)**

|    | SNP        | chr | EA | OA | GY     | SE_GY | pval    |
|----|------------|-----|----|----|--------|-------|---------|
| 1  | rs10480300 | 7   | T  | C  | 0.014  | 0.017 | 0.4349  |
| 2  | rs10821905 | 10  | A  | G  | -0.025 | 0.021 | 0.2371  |
| 3  | rs11264341 | 1   | T  | C  | 0.005  | 0.017 | 0.7549  |
| 4  | rs1165151  | 6   | T  | G  | -0.004 | 0.016 | 0.8201  |
| 5  | rs1171614  | 10  | T  | C  | -0.004 | 0.019 | 0.8503  |
| 6  | rs1178977  | 7   | G  | A  | -0.011 | 0.021 | 0.6132  |
| 7  | rs12498742 | 4   | G  | A  | 0.014  | 0.018 | 0.4517  |
| 8  | rs1260326  | 2   | T  | C  | -0.001 | 0.016 | 0.9608  |
| 9  | rs1394125  | 15  | A  | G  | 0.028  | 0.017 | 0.09825 |
| 10 | rs1471633  | 1   | A  | C  | 0.029  | 0.016 | 0.07095 |
| 11 | rs17050272 | 2   | A  | G  | 0.005  | 0.017 | 0.7625  |
| 12 | rs17632159 | 5   | C  | G  | -0.012 | 0.017 | 0.4888  |
| 13 | rs17786744 | 8   | G  | A  | 0.015  | 0.016 | 0.3461  |
| 14 | rs2078267  | 11  | C  | T  | -0.022 | 0.016 | 0.1722  |
| 15 | rs2231142  | 4   | T  | G  | 0.025  | 0.026 | 0.3347  |
| 16 | rs2941484  | 8   | T  | C  | 0.011  | 0.016 | 0.4893  |
| 17 | rs3741414  | 12  | T  | C  | 0.009  | 0.019 | 0.6299  |
| 18 | rs478607   | 11  | G  | A  | 0.018  | 0.022 | 0.4173  |
| 19 | rs653178   | 12  | C  | T  | 0.027  | 0.016 | 0.09708 |
| 20 | rs6598541  | 15  | A  | G  | 0.005  | 0.016 | 0.7584  |
| 21 | rs675209   | 6   | T  | C  | -0.011 | 0.018 | 0.5271  |
| 22 | rs6770152  | 3   | G  | T  | 0.015  | 0.016 | 0.3378  |
| 23 | rs7188445  | 16  | A  | G  | 0.016  | 0.017 | 0.3453  |
| 24 | rs7193778  | 16  | C  | T  | -0.005 | 0.023 | 0.8233  |
| 25 | rs7224610  | 17  | C  | A  | 0.018  | 0.016 | 0.2631  |
| 26 | rs729761   | 6   | T  | G  | 0.020  | 0.019 | 0.2834  |
| 27 | rs7953704  | 12  | A  | G  | 0.012  | 0.016 | 0.4454  |
| 28 | rs7976059  | 12  | T  | G  | -0.031 | 0.017 | 0.07669 |

SNP: each SNP's id; chr: chromosome; EA: effect allele, OA: other allele; GY: beta for the SNP-Alzheimer's disease relationship; SE\_GY: standard error of GY; pval: p-value of GY

**Table S7. The association estimates of the 28 SNPs for urate (1) with coronary heart disease (CHD) (6)**

|    | SNP        | chr | EA | OA | EAF   | GY     | SE_GY | pval      |
|----|------------|-----|----|----|-------|--------|-------|-----------|
| 1  | rs10480300 | 7   | C  | T  | 0.758 | 0.017  | 0.011 | 0.1365408 |
| 2  | rs10821905 | 10  | G  | A  | 0.820 | 0.023  | 0.012 | 0.055396  |
| 3  | rs11264341 | 1   | C  | T  | 0.568 | -0.017 | 0.010 | 0.081745  |
| 4  | rs1165151  | 6   | G  | T  | 0.539 | -0.016 | 0.009 | 0.0815358 |
| 5  | rs1171614  | 10  | C  | T  | 0.762 | -0.012 | 0.012 | 0.3340968 |
| 6  | rs1178977  | 7   | A  | G  | 0.823 | 0.006  | 0.013 | 0.6071614 |
| 7  | rs12498742 | 4   | A  | G  | 0.767 | 0.012  | 0.011 | 0.2830966 |
| 8  | rs1260326  | 2   | C  | T  | 0.610 | -0.003 | 0.010 | 0.7349392 |
| 9  | rs1394125  | 15  | G  | A  | 0.691 | -0.006 | 0.011 | 0.5658209 |
| 10 | rs1471633  | 1   | A  | C  | 0.537 | 0.017  | 0.010 | 0.0749271 |
| 11 | rs17050272 | 2   | G  | A  | 0.597 | -0.006 | 0.010 | 0.5597656 |
| 12 | rs17632159 | 5   | G  | C  | 0.691 | -0.003 | 0.010 | 0.7899725 |
| 13 | rs17786744 | 8   | A  | G  | 0.630 | -0.005 | 0.010 | 0.6015566 |
| 14 | rs2078267  | 11  | C  | T  | 0.540 | 0.001  | 0.010 | 0.9107651 |
| 15 | rs2231142  | 4   | G  | T  | 0.887 | 0.024  | 0.015 | 0.1143624 |
| 16 | rs2941484  | 8   | C  | T  | 0.563 | -0.010 | 0.009 | 0.2861924 |
| 17 | rs3741414  | 12  | C  | T  | 0.799 | -0.012 | 0.012 | 0.3185743 |
| 18 | rs478607   | 11  | A  | G  | 0.810 | 0.005  | 0.013 | 0.668657  |
| 19 | rs653178   | 12  | T  | C  | 0.579 | -0.064 | 0.010 | 5.15E-10  |
| 20 | rs6598541  | 15  | G  | A  | 0.598 | 0.006  | 0.009 | 0.5183619 |
| 21 | rs675209   | 6   | C  | T  | 0.645 | 0.016  | 0.010 | 0.1229597 |
| 22 | rs6770152  | 3   | T  | G  | 0.573 | -0.019 | 0.009 | 0.0409614 |
| 23 | rs7188445  | 16  | G  | A  | 0.705 | 0.007  | 0.011 | 0.515785  |
| 24 | rs7193778  | 16  | T  | C  | 0.836 | -0.009 | 0.014 | 0.4928628 |
| 25 | rs7224610  | 17  | A  | C  | 0.607 | 0.006  | 0.010 | 0.5373028 |
| 26 | rs729761   | 6   | G  | T  | 0.718 | -0.013 | 0.011 | 0.2615705 |
| 27 | rs7953704  | 12  | G  | A  | 0.527 | -0.009 | 0.009 | 0.3281571 |
| 28 | rs7976059  | 12  | G  | T  | 0.632 | 0.004  | 0.010 | 0.6806164 |

SNP: each SNP's id; chr: chromosome; EA: effect allele, OA: other allele; EAF: effect allele frequency for GY; GY: beta for the SNP-CHD relationship; SE\_GY: standard error of GY; pval: p-value of GY

**Table S8. The association estimates of the 28 SNPs for urate (1) with myocardial infarction (MI) (6)**

|    | SNP        | chr | EA | OA | EAF   | GY     | SE_GY | pval       |
|----|------------|-----|----|----|-------|--------|-------|------------|
| 1  | rs10480300 | 7   | T  | C  | 0.245 | 0.010  | 0.013 | 0.41820349 |
| 2  | rs10821905 | 10  | A  | G  | 0.176 | 0.035  | 0.013 | 0.00932379 |
| 3  | rs11264341 | 1   | T  | C  | 0.421 | -0.016 | 0.011 | 0.13180104 |
| 4  | rs1165151  | 6   | G  | T  | 0.533 | -0.023 | 0.010 | 0.02632004 |
| 5  | rs1171614  | 10  | C  | T  | 0.742 | -0.002 | 0.014 | 0.87910941 |
| 6  | rs1178977  | 7   | G  | A  | 0.172 | 0.007  | 0.014 | 0.63826783 |
| 7  | rs12498742 | 4   | G  | A  | 0.228 | 0.013  | 0.012 | 0.29664083 |
| 8  | rs1260326  | 2   | T  | C  | 0.422 | -0.001 | 0.011 | 0.9166279  |
| 9  | rs1394125  | 15  | A  | G  | 0.299 | -0.002 | 0.012 | 0.88583215 |
| 10 | rs1471633  | 1   | C  | A  | 0.452 | 0.016  | 0.011 | 0.13190286 |
| 11 | rs17050272 | 2   | A  | G  | 0.378 | 0.005  | 0.011 | 0.64781176 |
| 12 | rs17632159 | 5   | C  | G  | 0.298 | -0.007 | 0.011 | 0.51468404 |
| 13 | rs17786744 | 8   | G  | A  | 0.369 | -0.005 | 0.011 | 0.65350967 |
| 14 | rs2078267  | 11  | T  | C  | 0.438 | -0.008 | 0.011 | 0.47673314 |
| 15 | rs2231142  | 4   | T  | G  | 0.110 | 0.022  | 0.017 | 0.19174707 |
| 16 | rs2941484  | 8   | T  | C  | 0.430 | -0.018 | 0.010 | 0.07495691 |
| 17 | rs3741414  | 12  | T  | C  | 0.193 | 0.003  | 0.014 | 0.82049052 |
| 18 | rs478607   | 11  | A  | G  | 0.776 | 0.004  | 0.014 | 0.78504645 |
| 19 | rs653178   | 12  | T  | C  | 0.558 | -0.077 | 0.012 | 2.84E-11   |
| 20 | rs6598541  | 15  | G  | A  | 0.580 | 0.010  | 0.011 | 0.35000693 |
| 21 | rs675209   | 6   | C  | T  | 0.627 | 0.018  | 0.011 | 0.10676248 |
| 22 | rs6770152  | 3   | T  | G  | 0.559 | -0.017 | 0.010 | 0.11390205 |
| 23 | rs7188445  | 16  | A  | G  | 0.291 | 0.005  | 0.012 | 0.65739895 |
| 24 | rs7193778  | 16  | T  | C  | 0.811 | 0.003  | 0.015 | 0.83535075 |
| 25 | rs7224610  | 17  | A  | C  | 0.587 | 0.003  | 0.011 | 0.78176886 |
| 26 | rs729761   | 6   | G  | T  | 0.696 | -0.018 | 0.012 | 0.14330225 |
| 27 | rs7953704  | 12  | G  | A  | 0.513 | -0.019 | 0.010 | 0.0648285  |
| 28 | rs7976059  | 12  | T  | G  | 0.357 | 0.006  | 0.011 | 0.55745239 |

SNP: each SNP's id; chr: chromosome; EA: effect allele, OA: other allele; EAF: effect allele frequency for GY; GY: beta for the SNP-MI relationship; SE\_GY: standard error of GY; pval: p-value of GY

**Table S9. The association estimates of the 28 SNPs for urate (1) with systolic blood pressure (SBP) (8)**

|    | SNP        | chr | EA | OA | GY     | SE_GY | pval       |
|----|------------|-----|----|----|--------|-------|------------|
| 1  | rs10480300 | 7   | T  | C  | 0.015  | 0.003 | 1.45E-07   |
| 2  | rs10821905 | 10  | A  | G  | 0.009  | 0.003 | 0.00435053 |
| 3  | rs11264341 | 1   | T  | C  | -0.008 | 0.002 | 0.00082043 |
| 4  | rs1165151  | 6   | G  | T  | -0.006 | 0.002 | 0.00999244 |
| 5  | rs1171614  | 10  | C  | T  | -0.008 | 0.003 | 0.00897198 |
| 6  | rs1178977  | 7   | G  | A  | 0.001  | 0.003 | 0.676104   |
| 7  | rs12498742 | 4   | G  | A  | 0.004  | 0.003 | 0.21947    |
| 8  | rs1260326  | 2   | C  | T  | 0.005  | 0.003 | 0.0439014  |
| 9  | rs1394125  | 15  | A  | G  | 0.002  | 0.003 | 0.47681    |
| 10 | rs1471633  | 1   | C  | A  | 0.002  | 0.002 | 0.313305   |
| 11 | rs17050272 | 2   | A  | G  | 0.002  | 0.002 | 0.353964   |
| 12 | rs17632159 | 5   | C  | G  | 0.003  | 0.003 | 0.348555   |
| 13 | rs17786744 | 8   | G  | A  | 0.004  | 0.003 | 0.158785   |
| 14 | rs2078267  | 11  | T  | C  | 0.000  | 0.002 | 0.998987   |
| 15 | rs2231142  | 4   | T  | G  | -0.011 | 0.004 | 0.00493599 |
| 16 | rs2941484  | 8   | T  | C  | 0.008  | 0.002 | 0.00218681 |
| 17 | rs3741414  | 12  | T  | C  | -0.009 | 0.003 | 0.00195694 |
| 18 | rs478607   | 11  | A  | G  | -0.005 | 0.003 | 0.136448   |
| 19 | rs653178   | 12  | T  | C  | -0.021 | 0.002 | 1.16E-17   |
| 20 | rs6598541  | 15  | G  | A  | -0.001 | 0.003 | 0.618474   |
| 21 | rs675209   | 6   | C  | T  | -0.001 | 0.003 | 0.592666   |
| 22 | rs6770152  | 3   | T  | G  | -0.006 | 0.002 | 0.0220286  |
| 23 | rs7188445  | 16  | A  | G  | 0.001  | 0.003 | 0.654585   |
| 24 | rs7193778  | 16  | T  | C  | -0.016 | 0.003 | 2.19E-06   |
| 25 | rs7224610  | 17  | A  | C  | -0.008 | 0.003 | 0.0024854  |
| 26 | rs729761   | 6   | G  | T  | 0.002  | 0.003 | 0.506385   |
| 27 | rs7953704  | 12  | G  | A  | -0.004 | 0.002 | 0.124599   |
| 28 | rs7976059  | 12  | T  | G  | 0.005  | 0.003 | 0.048739   |

SNP: each SNP's id; chr: chromosome; EA: effect allele, OA: other allele; GY: beta for the SNP-SBP relationship; SE\_GY: standard error of GY; pval: p-value of GY

**Table S10. The association estimates of the 28 SNPs for urate (1) with any ischemic stroke (IS) (10)**

|    | SNP        | chr | EA | OA | EAF   | GY     | SE_GY | pval     |
|----|------------|-----|----|----|-------|--------|-------|----------|
| 1  | rs10480300 | 7   | T  | C  | 0.268 | 0.015  | 0.010 | 0.1382   |
| 2  | rs10821905 | 10  | A  | G  | 0.193 | -0.007 | 0.011 | 0.5244   |
| 3  | rs11264341 | 1   | T  | C  | 0.468 | -0.007 | 0.009 | 0.4156   |
| 4  | rs1165151  | 6   | T  | G  | 0.432 | -0.012 | 0.009 | 0.1708   |
| 5  | rs1171614  | 10  | T  | C  | 0.226 | -0.003 | 0.012 | 0.7939   |
| 6  | rs1178977  | 7   | A  | G  | 0.811 | 0.008  | 0.012 | 0.5083   |
| 7  | rs12498742 | 4   | A  | G  | 0.728 | -0.010 | 0.011 | 0.366    |
| 8  | rs1260326  | 2   | T  | C  | 0.414 | 0.006  | 0.009 | 0.5155   |
| 9  | rs1394125  | 15  | A  | G  | 0.333 | 0.010  | 0.010 | 0.2888   |
| 10 | rs1471633  | 1   | A  | C  | 0.537 | 0.007  | 0.010 | 0.4749   |
| 11 | rs17050272 | 2   | A  | G  | 0.424 | -0.010 | 0.009 | 0.2692   |
| 12 | rs17632159 | 5   | C  | G  | 0.302 | 0.008  | 0.009 | 0.3547   |
| 13 | rs17786744 | 8   | A  | G  | 0.624 | -0.008 | 0.009 | 0.3781   |
| 14 | rs2078267  | 11  | T  | C  | 0.491 | 0.021  | 0.010 | 0.03     |
| 15 | rs2231142  | 4   | T  | G  | 0.175 | -0.003 | 0.013 | 0.8286   |
| 16 | rs2941484  | 8   | T  | C  | 0.454 | -0.007 | 0.009 | 0.4401   |
| 17 | rs3741414  | 12  | T  | C  | 0.227 | -0.002 | 0.011 | 0.8872   |
| 18 | rs478607   | 11  | A  | G  | 0.787 | -0.017 | 0.011 | 0.1007   |
| 19 | rs653178   | 12  | T  | C  | 0.543 | -0.077 | 0.010 | 4.31E-14 |
| 20 | rs6598541  | 15  | A  | G  | 0.409 | 0.011  | 0.009 | 0.1887   |
| 21 | rs675209   | 6   | T  | C  | 0.346 | -0.014 | 0.010 | 0.153    |
| 22 | rs6770152  | 3   | T  | G  | 0.566 | 0.012  | 0.009 | 0.1693   |
| 23 | rs7188445  | 16  | A  | G  | 0.312 | -0.002 | 0.009 | 0.8374   |
| 24 | rs7193778  | 16  | T  | C  | 0.861 | -0.009 | 0.012 | 0.4761   |
| 25 | rs7224610  | 17  | A  | C  | 0.631 | 0.002  | 0.009 | 0.8432   |
| 26 | rs729761   | 6   | T  | G  | 0.247 | -0.014 | 0.011 | 0.1802   |
| 27 | rs7953704  | 12  | A  | G  | 0.487 | -0.023 | 0.008 | 0.005882 |
| 28 | rs7976059  | 12  | T  | G  | 0.414 | -0.010 | 0.009 | 0.2491   |

SNP: each SNP's id; chr: chromosome; EA: effect allele, OA: other allele; EAF: effect allele frequency for GY; GY: beta for the SNP-IS relationship; SE\_GY: standard error of GY; pval: p-value of GY

**Table S11. The association estimates of the 28 SNPs for urate (1) with cardio-embolic stroke (CES) (10)**

|    | SNP        | chr | EA | OA | EAF   | GY     | SE_GY | pval     |
|----|------------|-----|----|----|-------|--------|-------|----------|
| 1  | rs10480300 | 7   | T  | C  | 0.268 | 0.006  | 0.020 | 0.7797   |
| 2  | rs10821905 | 10  | A  | G  | 0.194 | 0.022  | 0.023 | 0.3331   |
| 3  | rs11264341 | 1   | T  | C  | 0.447 | -0.034 | 0.017 | 0.05135  |
| 4  | rs1165151  | 6   | T  | G  | 0.456 | 0.006  | 0.018 | 0.74     |
| 5  | rs1171614  | 10  | T  | C  | 0.227 | 0.011  | 0.023 | 0.6229   |
| 6  | rs1178977  | 7   | A  | G  | 0.814 | 0.014  | 0.024 | 0.5559   |
| 7  | rs12498742 | 4   | A  | G  | 0.744 | -0.019 | 0.021 | 0.3559   |
| 8  | rs1260326  | 2   | T  | C  | 0.407 | -0.013 | 0.019 | 0.4791   |
| 9  | rs1394125  | 15  | A  | G  | 0.343 | -0.006 | 0.020 | 0.7566   |
| 10 | rs1471633  | 1   | A  | C  | 0.513 | -0.005 | 0.018 | 0.7993   |
| 11 | rs17050272 | 2   | A  | G  | 0.421 | -0.007 | 0.018 | 0.6876   |
| 12 | rs17632159 | 5   | C  | G  | 0.307 | 0.021  | 0.019 | 0.2671   |
| 13 | rs17786744 | 8   | A  | G  | 0.612 | 0.007  | 0.018 | 0.7048   |
| 14 | rs2078267  | 11  | T  | C  | 0.500 | 0.029  | 0.018 | 0.1192   |
| 15 | rs2231142  | 4   | T  | G  | 0.147 | 0.002  | 0.028 | 0.9473   |
| 16 | rs2941484  | 8   | T  | C  | 0.446 | -0.002 | 0.017 | 0.9104   |
| 17 | rs3741414  | 12  | T  | C  | 0.235 | 0.005  | 0.022 | 0.8014   |
| 18 | rs478607   | 11  | A  | G  | 0.809 | 0.025  | 0.024 | 0.2943   |
| 19 | rs653178   | 12  | T  | C  | 0.541 | -0.058 | 0.020 | 0.003023 |
| 20 | rs6598541  | 15  | A  | G  | 0.393 | 0.038  | 0.017 | 0.02562  |
| 21 | rs675209   | 6   | T  | C  | 0.321 | -0.013 | 0.021 | 0.513    |
| 22 | rs6770152  | 3   | T  | G  | 0.572 | -0.003 | 0.017 | 0.8761   |
| 23 | rs7188445  | 16  | A  | G  | 0.315 | -0.016 | 0.018 | 0.3768   |
| 24 | rs7193778  | 16  | T  | C  | 0.858 | -0.003 | 0.025 | 0.9134   |
| 25 | rs7224610  | 17  | A  | C  | 0.610 | 0.011  | 0.018 | 0.5317   |
| 26 | rs729761   | 6   | T  | G  | 0.258 | 0.008  | 0.022 | 0.7082   |
| 27 | rs7953704  | 12  | A  | G  | 0.487 | -0.024 | 0.017 | 0.1624   |
| 28 | rs7976059  | 12  | T  | G  | 0.387 | -0.015 | 0.018 | 0.4187   |

SNP: each SNP's id; chr: chromosome; EA: effect allele, OA: other allele; EAF: effect allele frequency for GY; GY: beta for the SNP-CE relationship; SE\_GY: standard error of GY; pval: p-value of GY

**Table S12. The association estimates of the 28 SNPs for urate (1) with large-artery atherosclerotic stroke (LAS) (10)**

|    | SNP        | chr | EA | OA | EAF   | GY     | SE_GY | pval     |
|----|------------|-----|----|----|-------|--------|-------|----------|
| 1  | rs10480300 | 7   | T  | C  | 0.269 | 0.030  | 0.026 | 0.2486   |
| 2  | rs10821905 | 10  | A  | G  | 0.183 | 0.015  | 0.028 | 0.6083   |
| 3  | rs11264341 | 1   | T  | C  | 0.484 | -0.032 | 0.021 | 0.1239   |
| 4  | rs1165151  | 6   | T  | G  | 0.426 | -0.032 | 0.022 | 0.1419   |
| 5  | rs1171614  | 10  | T  | C  | 0.227 | 0.038  | 0.029 | 0.1838   |
| 6  | rs1178977  | 7   | A  | G  | 0.823 | 0.023  | 0.028 | 0.4106   |
| 7  | rs12498742 | 4   | A  | G  | 0.740 | -0.027 | 0.026 | 0.3058   |
| 8  | rs1260326  | 2   | T  | C  | 0.436 | 0.012  | 0.022 | 0.5781   |
| 9  | rs1394125  | 15  | A  | G  | 0.324 | 0.045  | 0.024 | 0.06338  |
| 10 | rs1471633  | 1   | A  | C  | 0.546 | 0.008  | 0.023 | 0.7251   |
| 11 | rs17050272 | 2   | A  | G  | 0.431 | -0.024 | 0.021 | 0.2399   |
| 12 | rs17632159 | 5   | C  | G  | 0.304 | 0.011  | 0.022 | 0.6205   |
| 13 | rs17786744 | 8   | A  | G  | 0.635 | 0.001  | 0.021 | 0.9619   |
| 14 | rs2078267  | 11  | T  | C  | 0.496 | 0.028  | 0.024 | 0.2299   |
| 15 | rs2231142  | 4   | T  | G  | 0.192 | -0.008 | 0.029 | 0.7724   |
| 16 | rs2941484  | 8   | T  | C  | 0.447 | -0.001 | 0.020 | 0.9471   |
| 17 | rs3741414  | 12  | T  | C  | 0.216 | -0.009 | 0.027 | 0.7512   |
| 18 | rs478607   | 11  | A  | G  | 0.799 | -0.046 | 0.027 | 0.08713  |
| 19 | rs653178   | 12  | T  | C  | 0.534 | -0.094 | 0.026 | 0.000238 |
| 20 | rs6598541  | 15  | A  | G  | 0.414 | 0.017  | 0.020 | 0.3917   |
| 21 | rs675209   | 6   | T  | C  | 0.364 | -0.025 | 0.025 | 0.3254   |
| 22 | rs6770152  | 3   | T  | G  | 0.553 | 0.014  | 0.020 | 0.501    |
| 23 | rs7188445  | 16  | A  | G  | 0.313 | 0.044  | 0.022 | 0.04303  |
| 24 | rs7193778  | 16  | T  | C  | 0.862 | -0.081 | 0.029 | 0.005975 |
| 25 | rs7224610  | 17  | A  | C  | 0.639 | 0.025  | 0.022 | 0.2496   |
| 26 | rs729761   | 6   | T  | G  | 0.244 | -0.024 | 0.026 | 0.3675   |
| 27 | rs7953704  | 12  | A  | G  | 0.490 | -0.041 | 0.020 | 0.03757  |
| 28 | rs7976059  | 12  | T  | G  | 0.437 | 0.016  | 0.021 | 0.4463   |

SNP: each SNP's id; chr: chromosome; EA: effect allele, OA: other allele; EAF: effect allele frequency for GY; GY: beta for the SNP-LAS relationship; SE\_GY: standard error of GY; pval: p-value of GY



**Table S13. The association estimates of the 28 SNPs for urate (1) with small-vessel stroke (SVS) (10)**

|    | SNP        | chr | EA | OA | EAF   | GY     | SE_GY | pval     |
|----|------------|-----|----|----|-------|--------|-------|----------|
| 1  | rs10480300 | 7   | T  | C  | 0.265 | -0.021 | 0.024 | 0.3765   |
| 2  | rs10821905 | 10  | A  | G  | 0.178 | -0.017 | 0.025 | 0.489    |
| 3  | rs11264341 | 1   | T  | C  | 0.521 | 0.014  | 0.017 | 0.4048   |
| 4  | rs1165151  | 6   | T  | G  | 0.388 | -0.041 | 0.019 | 0.03197  |
| 5  | rs1171614  | 10  | T  | C  | 0.228 | -0.004 | 0.026 | 0.8896   |
| 6  | rs1178977  | 7   | A  | G  | 0.822 | 0.011  | 0.023 | 0.6485   |
| 7  | rs12498742 | 4   | A  | G  | 0.721 | 0.018  | 0.024 | 0.4411   |
| 8  | rs1260326  | 2   | T  | C  | 0.453 | 0.021  | 0.018 | 0.2346   |
| 9  | rs1394125  | 15  | A  | G  | 0.304 | -0.032 | 0.021 | 0.126    |
| 10 | rs1471633  | 1   | A  | C  | 0.578 | 0.007  | 0.020 | 0.7272   |
| 11 | rs17050272 | 2   | A  | G  | 0.436 | -0.031 | 0.017 | 0.07663  |
| 12 | rs17632159 | 5   | C  | G  | 0.297 | 0.042  | 0.018 | 0.02171  |
| 13 | rs17786744 | 8   | A  | G  | 0.653 | 0.010  | 0.018 | 0.5885   |
| 14 | rs2078267  | 11  | T  | C  | 0.486 | 0.020  | 0.022 | 0.3554   |
| 15 | rs2231142  | 4   | T  | G  | 0.219 | 0.005  | 0.023 | 0.8172   |
| 16 | rs2941484  | 8   | T  | C  | 0.452 | -0.008 | 0.017 | 0.6376   |
| 17 | rs3741414  | 12  | T  | C  | 0.204 | 0.021  | 0.023 | 0.3575   |
| 18 | rs478607   | 11  | A  | G  | 0.771 | -0.035 | 0.021 | 0.09941  |
| 19 | rs653178   | 12  | T  | C  | 0.544 | -0.104 | 0.023 | 8.42E-06 |
| 20 | rs6598541  | 15  | A  | G  | 0.434 | 0.004  | 0.017 | 0.7922   |
| 21 | rs675209   | 6   | T  | C  | 0.408 | -0.014 | 0.022 | 0.5217   |
| 22 | rs6770152  | 3   | T  | G  | 0.539 | 0.013  | 0.017 | 0.4429   |
| 23 | rs7188445  | 16  | A  | G  | 0.309 | 0.004  | 0.018 | 0.8338   |
| 24 | rs7193778  | 16  | T  | C  | 0.865 | -0.016 | 0.025 | 0.5174   |
| 25 | rs7224610  | 17  | A  | C  | 0.669 | -0.007 | 0.019 | 0.7091   |
| 26 | rs729761   | 6   | T  | G  | 0.226 | -0.055 | 0.022 | 0.01285  |
| 27 | rs7953704  | 12  | A  | G  | 0.491 | -0.008 | 0.016 | 0.6139   |
| 28 | rs7976059  | 12  | T  | G  | 0.483 | -0.023 | 0.018 | 0.1978   |

SNP: each SNP's id; chr: chromosome; EA: effect allele, OA: other allele; EAF: effect allele frequency for GY; GY: beta for the SNP-SVS relationship; SE\_GY: standard error of GY; pval: p-value of GY

**Figure S1. Forest plot of the 28 MR estimates of the urate-cognitive performance relationship.**

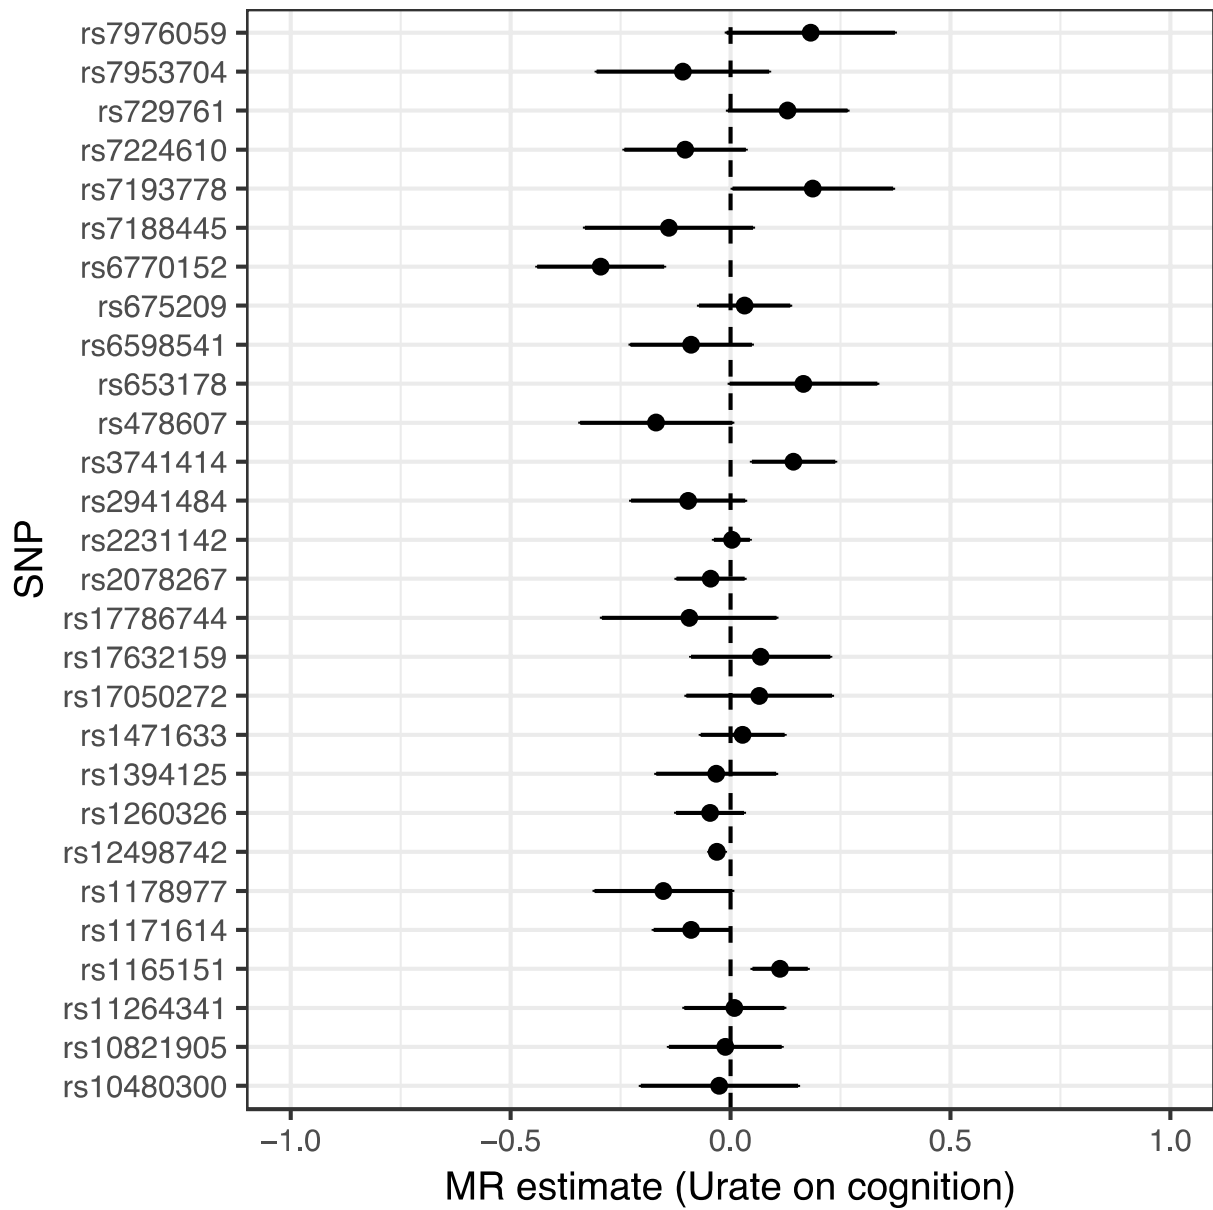

Each dot indicates the effect estimate of each SNP with horizontal lines represent the 95% confidence interval (CI) of this estimate.

**Figure S2. Forest plot of the 28 MR estimates of the urate-Alzheimer's disease relationship.**

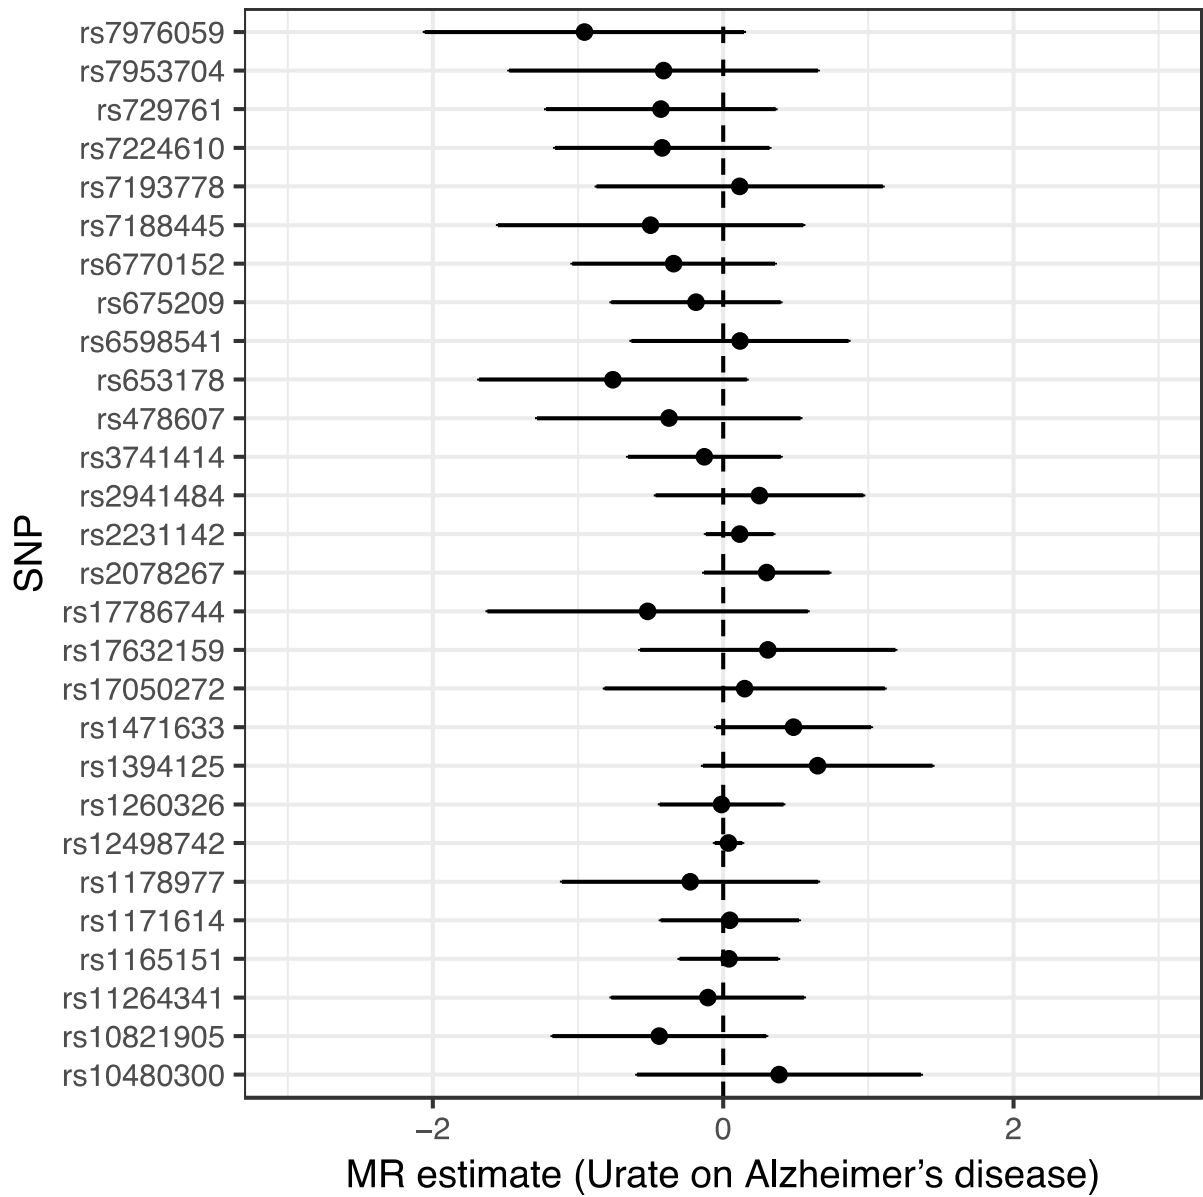

Each dot indicates the effect estimate (logOR) of each SNP with horizontal lines represent the 95% confidence interval (CI) of this estimate.

**Figure S3. Forest plot of the 28 MR estimates of the urate-coronary heart disease (CHD) relationship.**

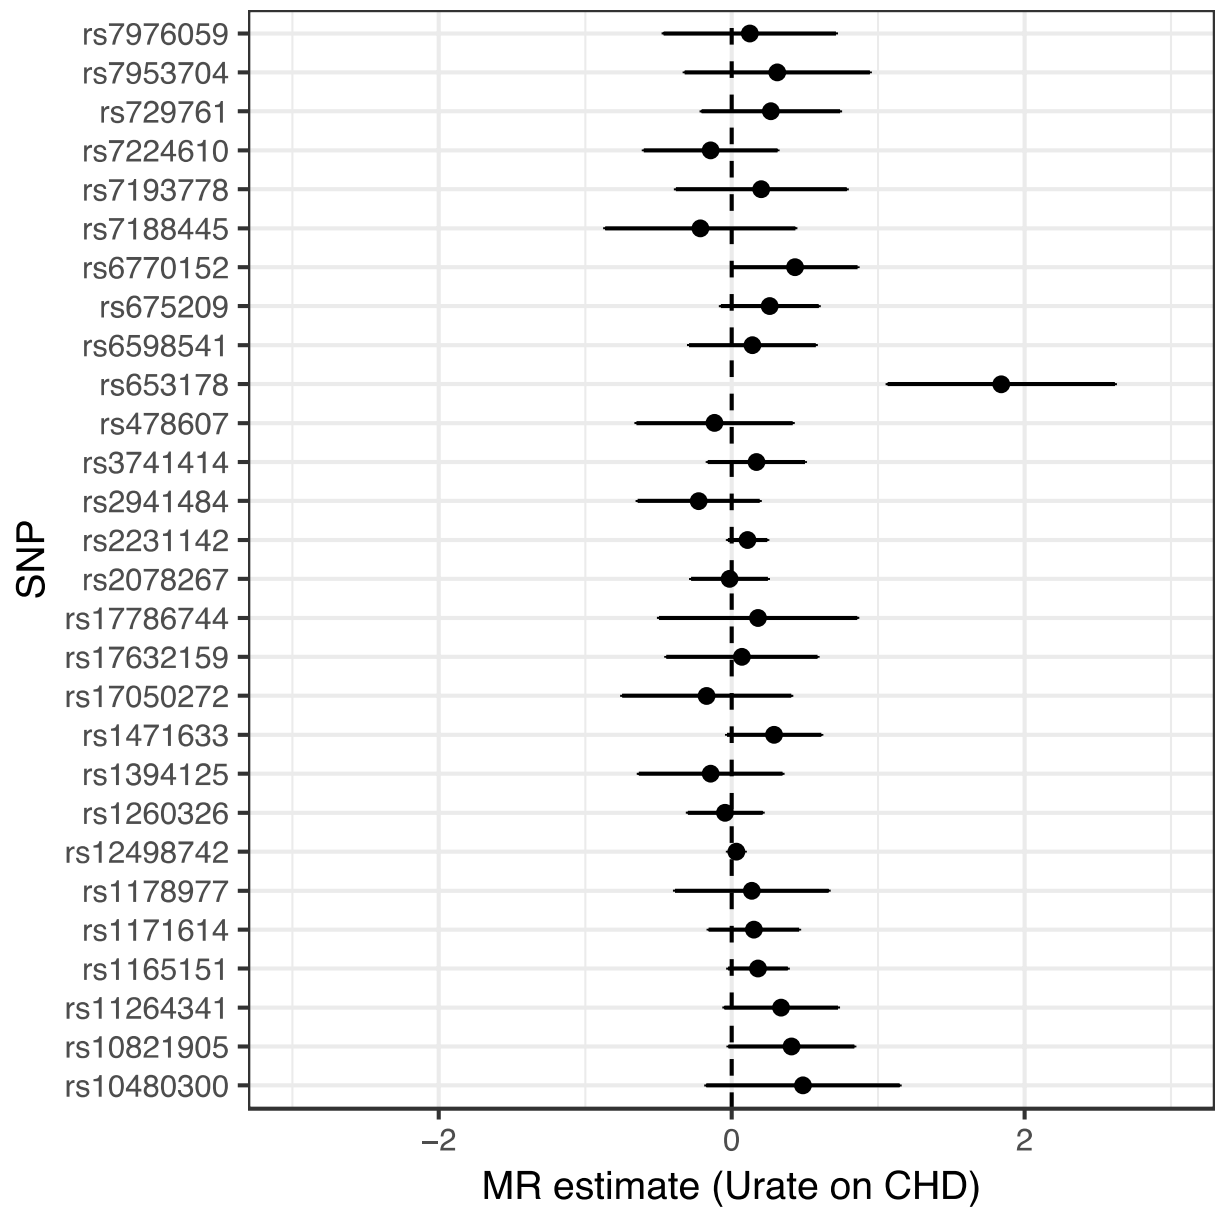

Each dot indicates the effect estimate (logOR) of each SNP with horizontal lines represent the 95% confidence interval (CI) of this estimate.

**Figure S4. Forest plot of the 28 MR estimates of the urate-myocardial infarction (MI) relationship.**

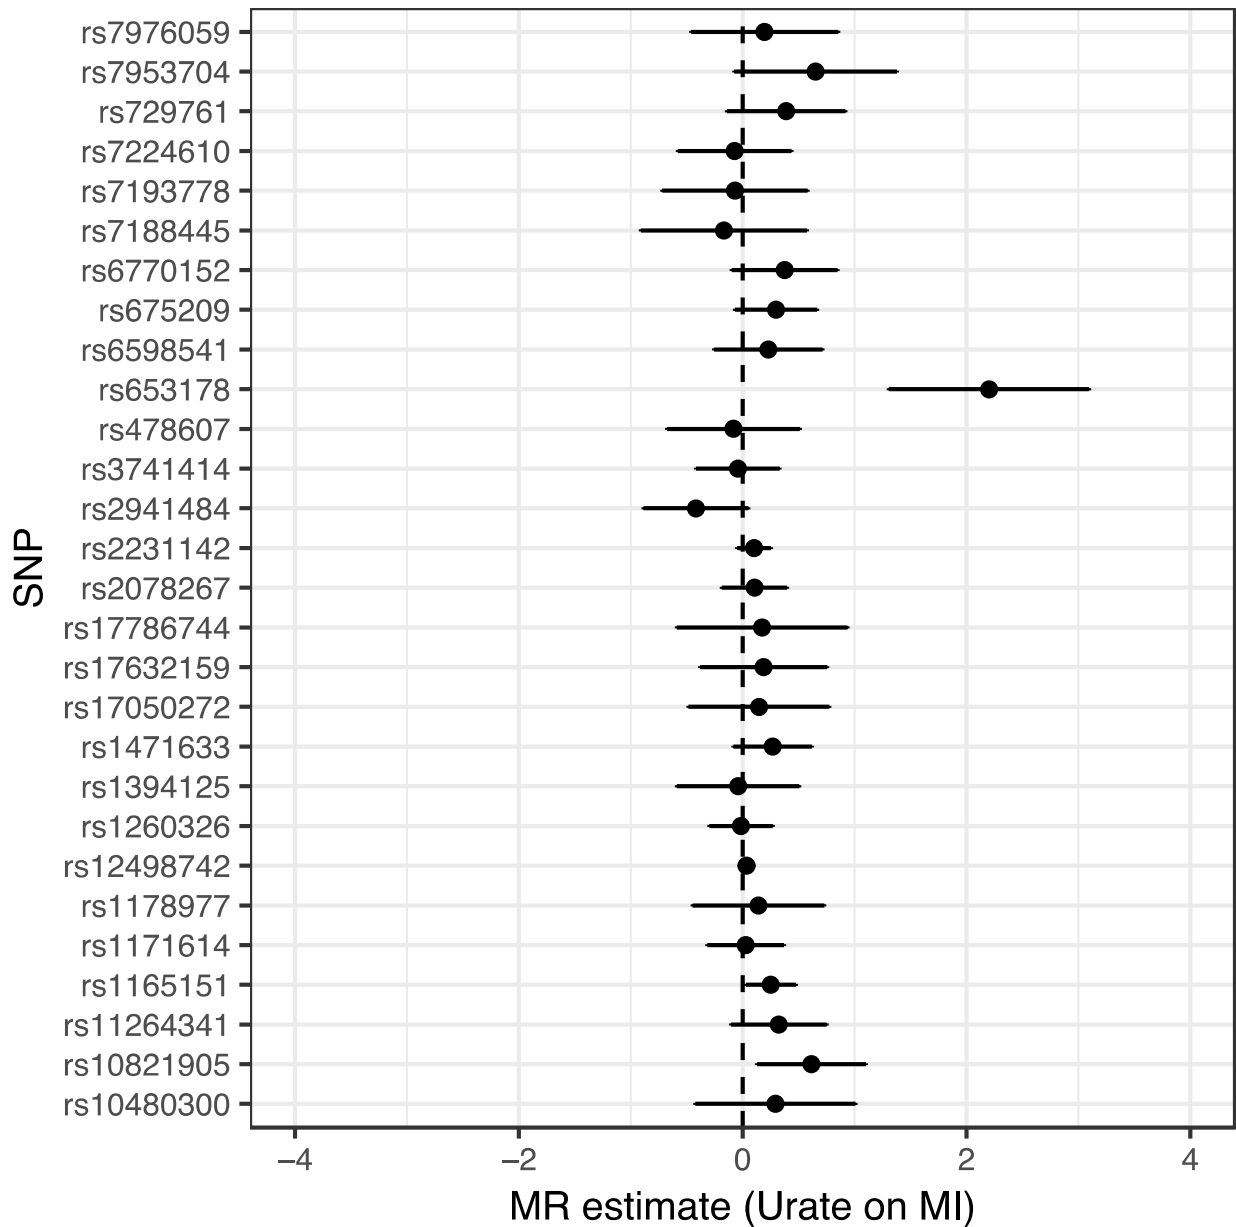

Each dot indicates the effect estimate (logOR) of each SNP with horizontal lines represent the 95% confidence interval (CI) of this estimate.

**Figure S5. Forest plot of the 28 MR estimates of the urate-systolic blood pressure (SBP) relationship.**

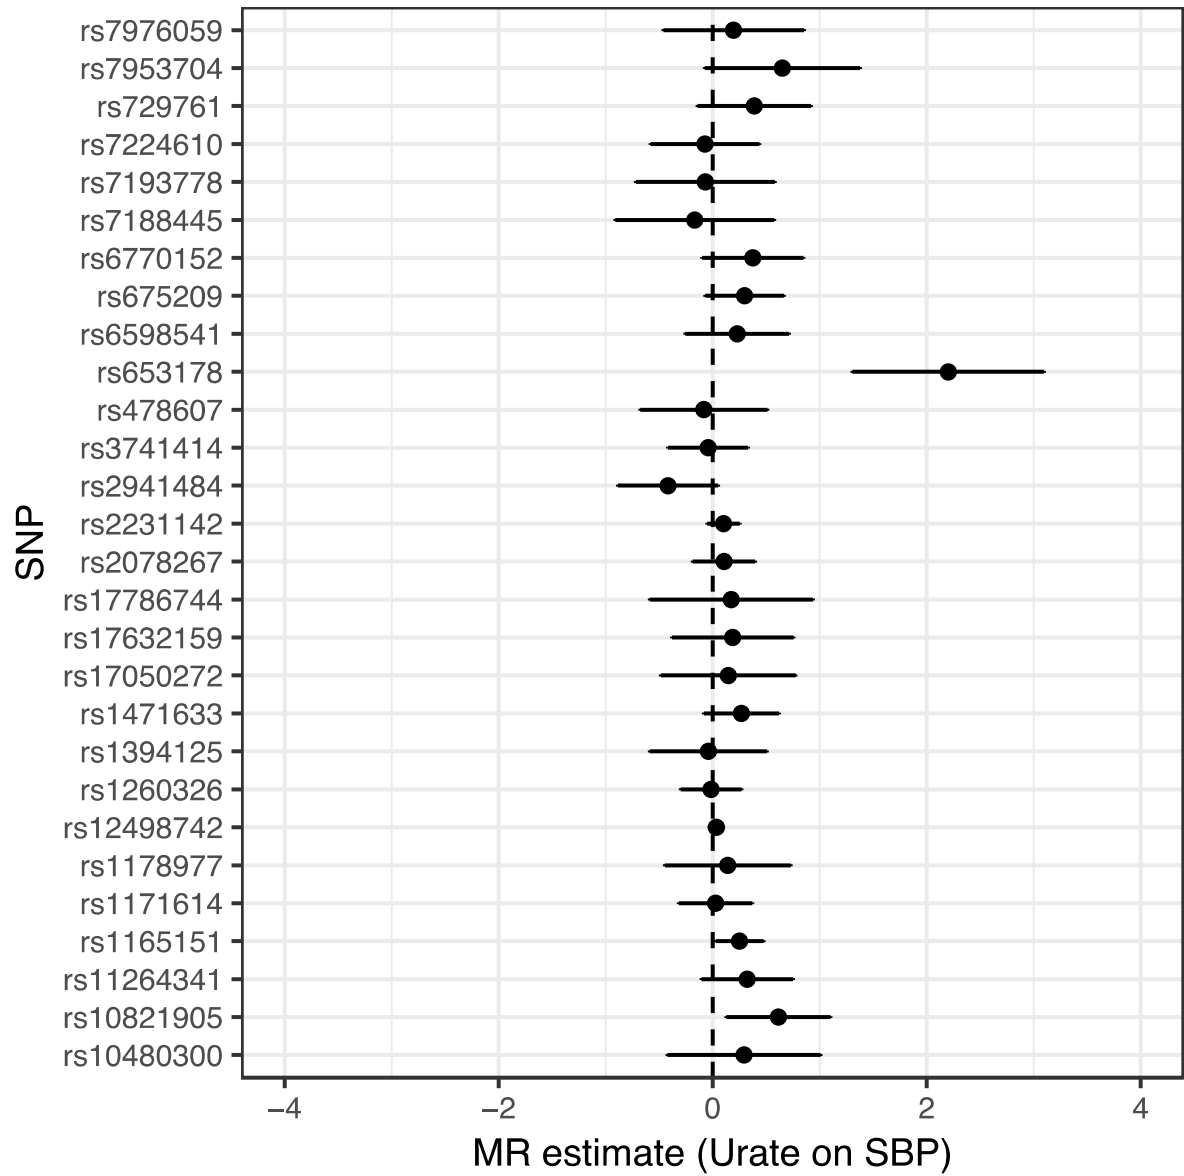

Each dot indicates the effect estimate of each SNP with horizontal lines represent the 95% confidence interval (CI) of this estimate.

**Figure S6. Forest plot of the 28 MR estimates of the urate- any ischemic stroke relationship.**

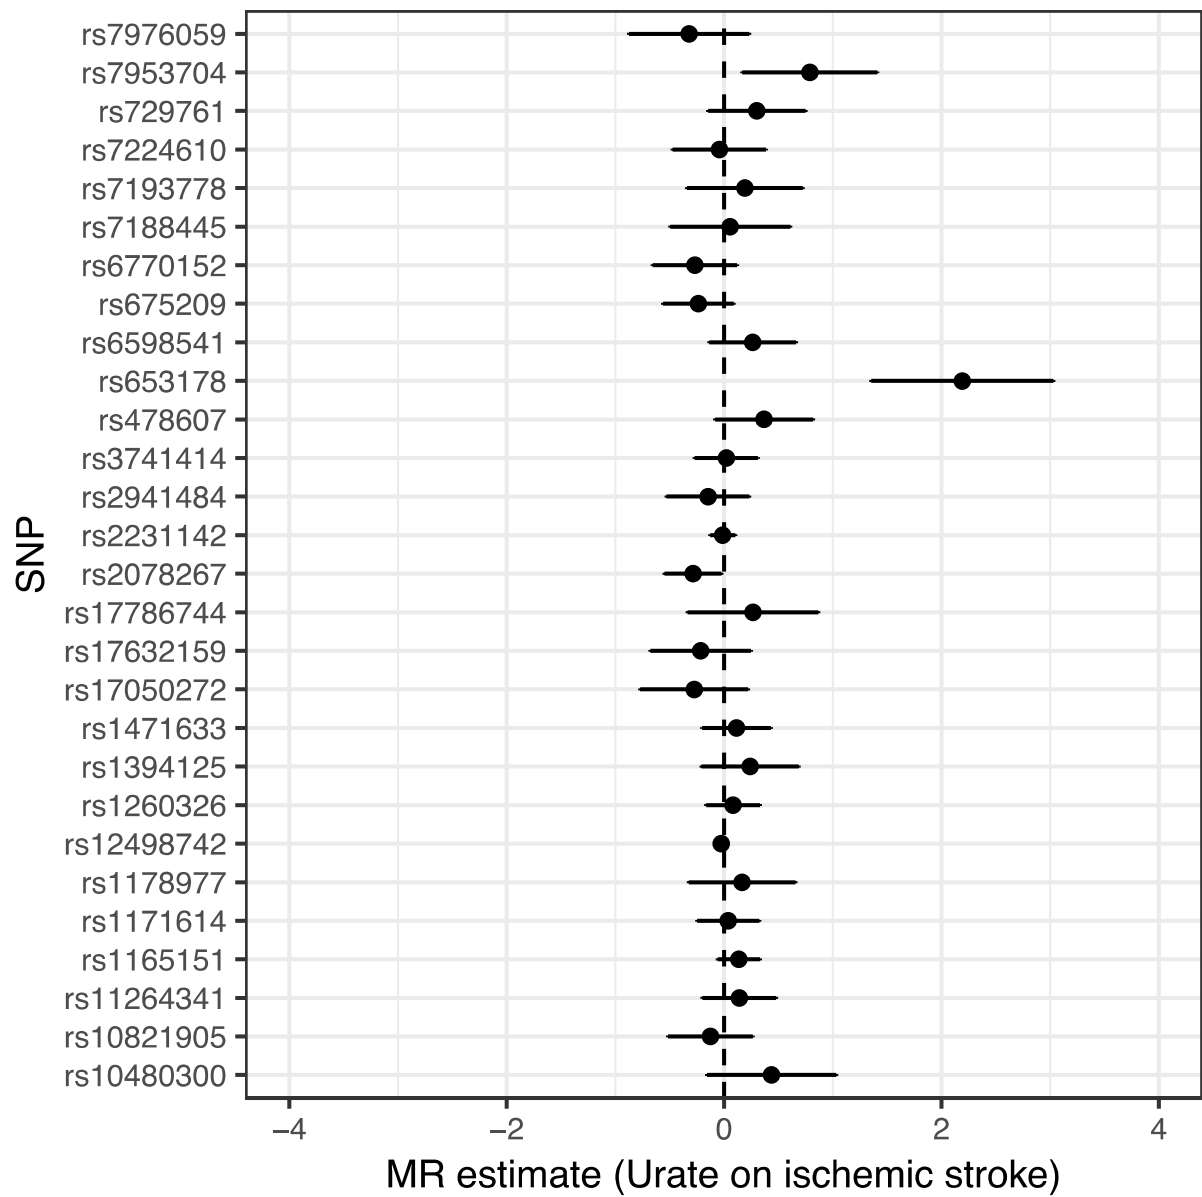

Each dot indicates the effect estimate (logOR) of each SNP with horizontal lines represent the 95% confidence interval (CI) of this estimate.

**Figure S7. Forest plot of the 28 MR estimates of the urate- cardioembolic stroke ischemic stroke (CES) relationship.**

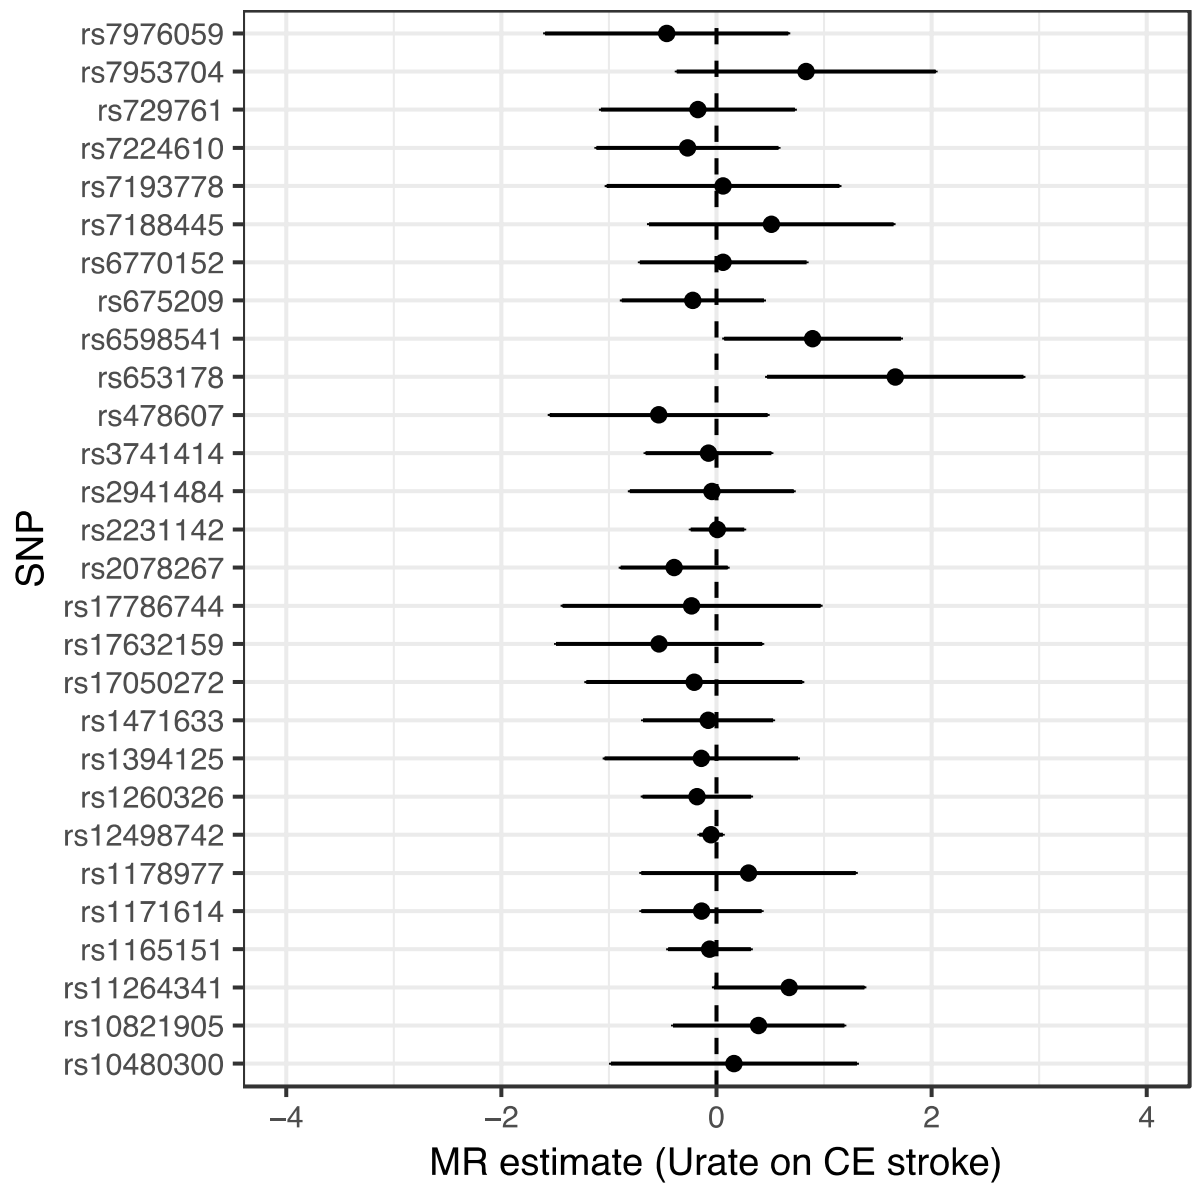

Each dot indicates the effect estimate (logOR) of each SNP with horizontal lines represent the 95% confidence interval (CI) of this estimate.



**Figure S8. Forest plot of the 28 MR estimates of the urate- large-artery atherosclerotic ischemic stroke (LAS) relationship.**

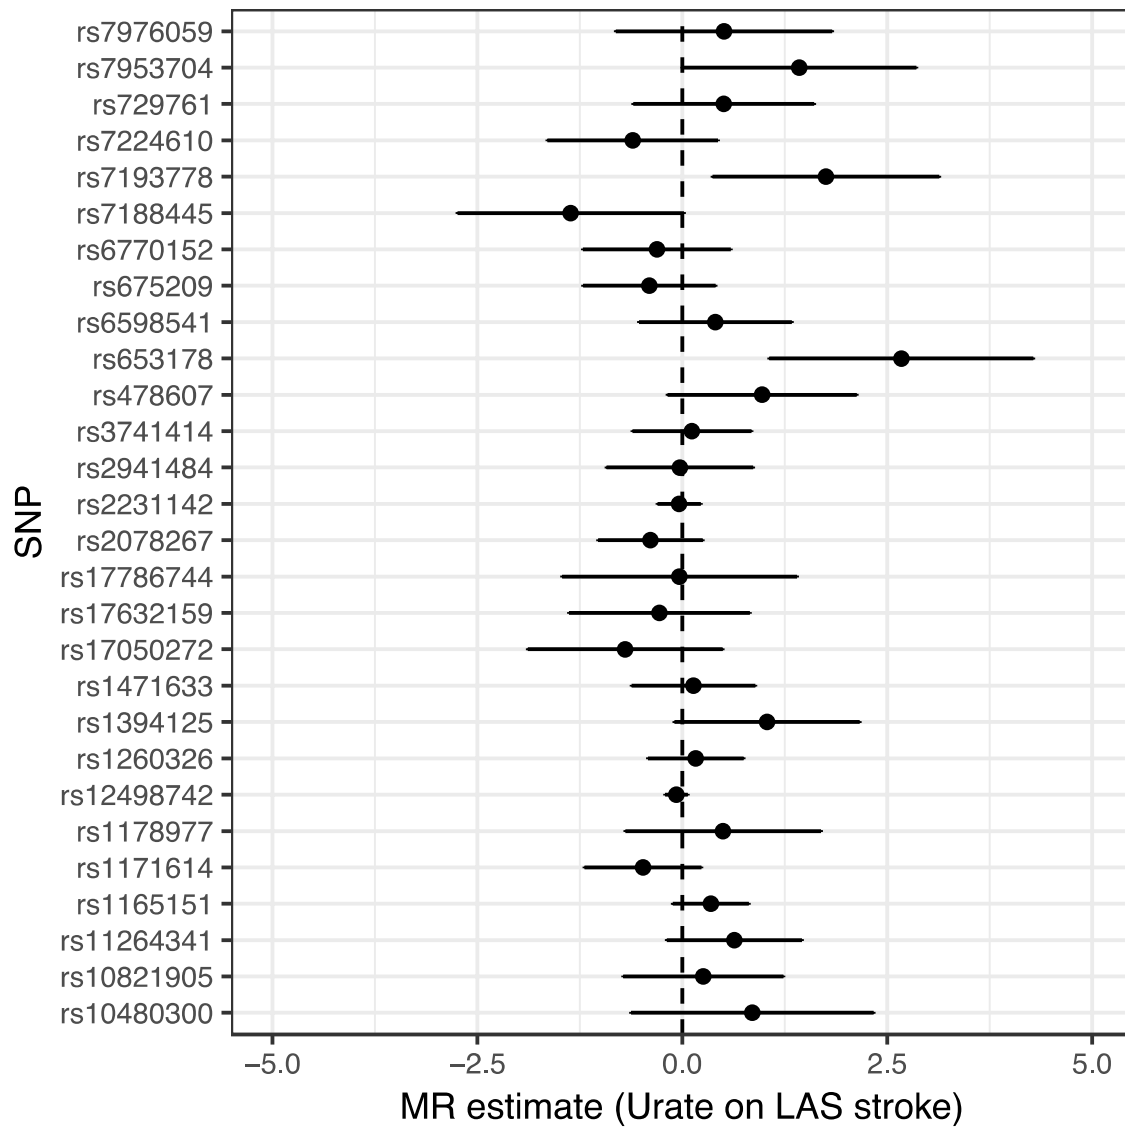

Each dot indicates the effect estimate (logOR) of each SNP with horizontal lines represent the 95% confidence interval (CI) of this estimate.

**Figure S9. Forest plot of the 28 MR estimates of the urate- small-artery stroke ischemic stroke (SAS) relationship.**

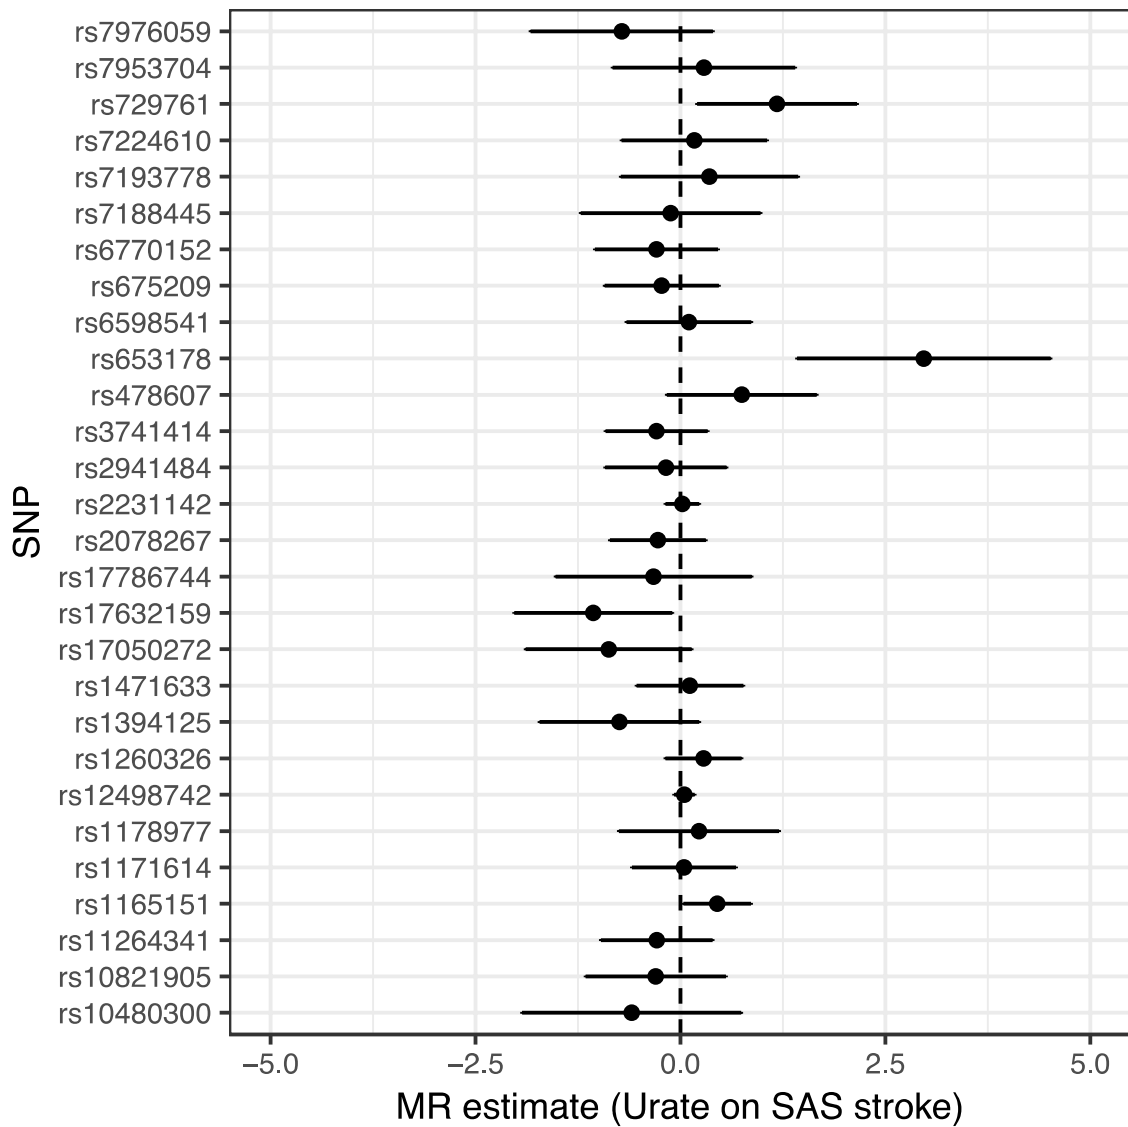

Each dot indicates the effect estimate (logOR) of each SNP with horizontal lines represent the 95% confidence interval (CI) of this estimate.

Figure S10. Funnel plot (A) and radial plot (B) for the urate-cognitive performance relationship.

(A)

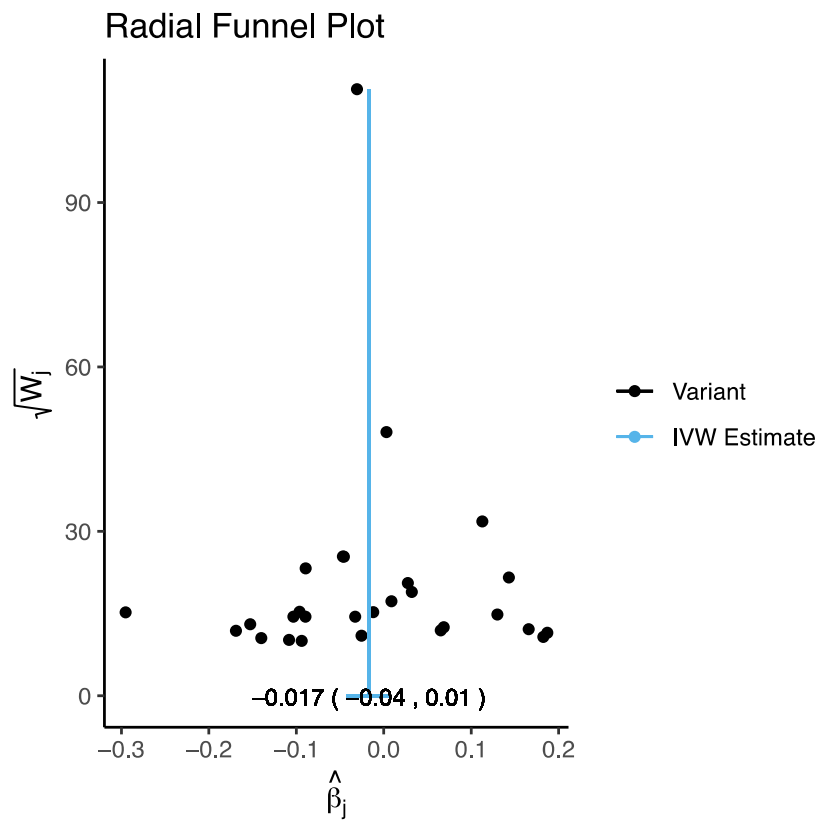

(B)

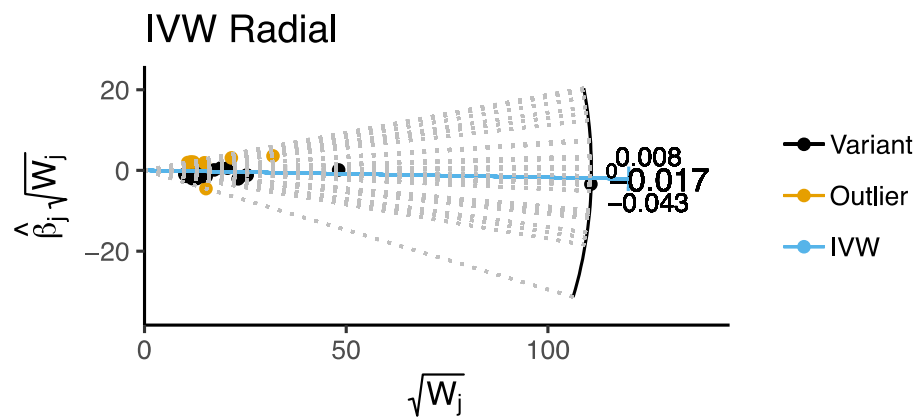

Figure S11. Funnel plot (A) and radial plot (B) for the urate-Alzheimer's disease relationship.

(A)

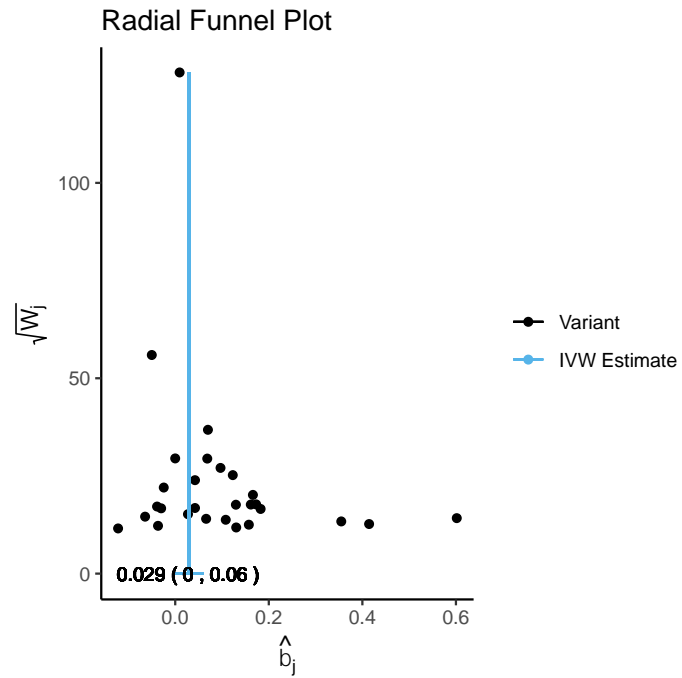

(B)

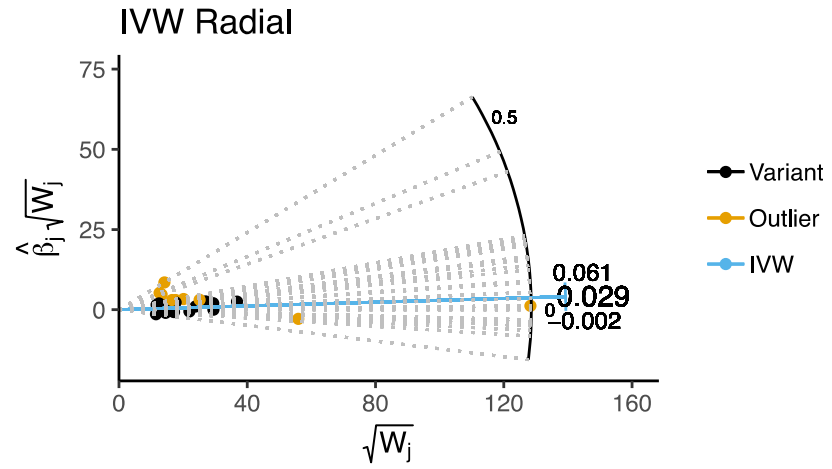

Figure S12. Funnel plot (A) and radial plot (B) for the urate-coronary heart disease (CHD) relationship.

(A)

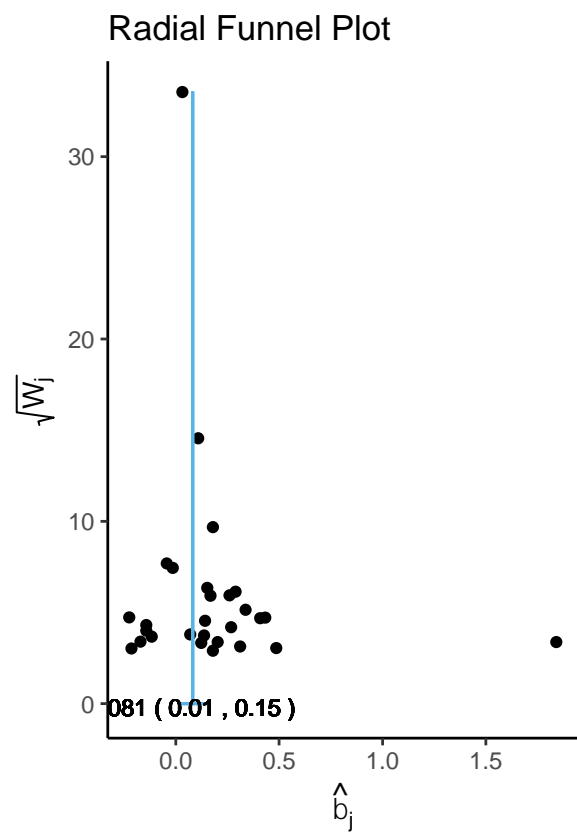

(B)

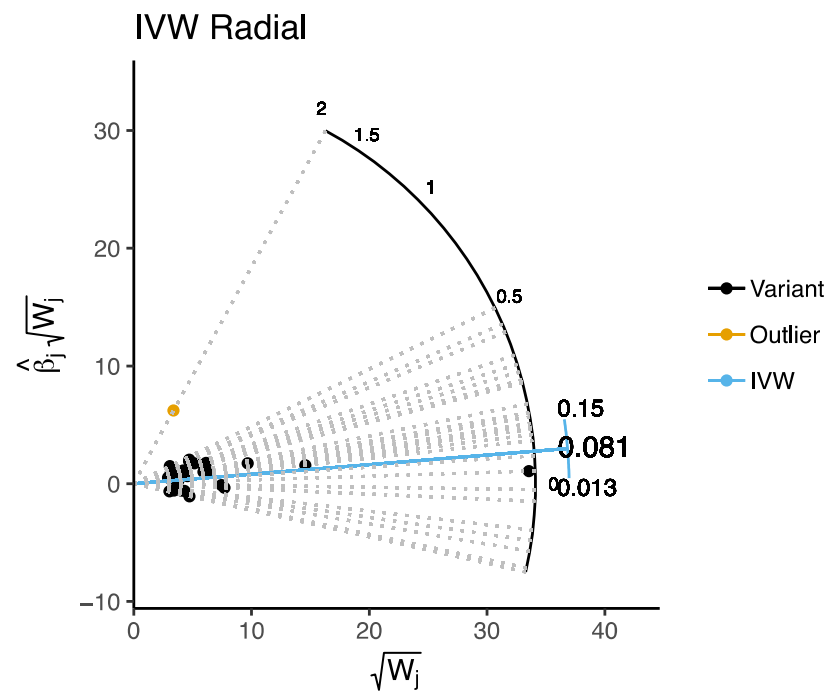

Figure S13. Funnel plot (A) and radial plot (B) for the urate-myocardial infarction (MI) relationship.

(A)

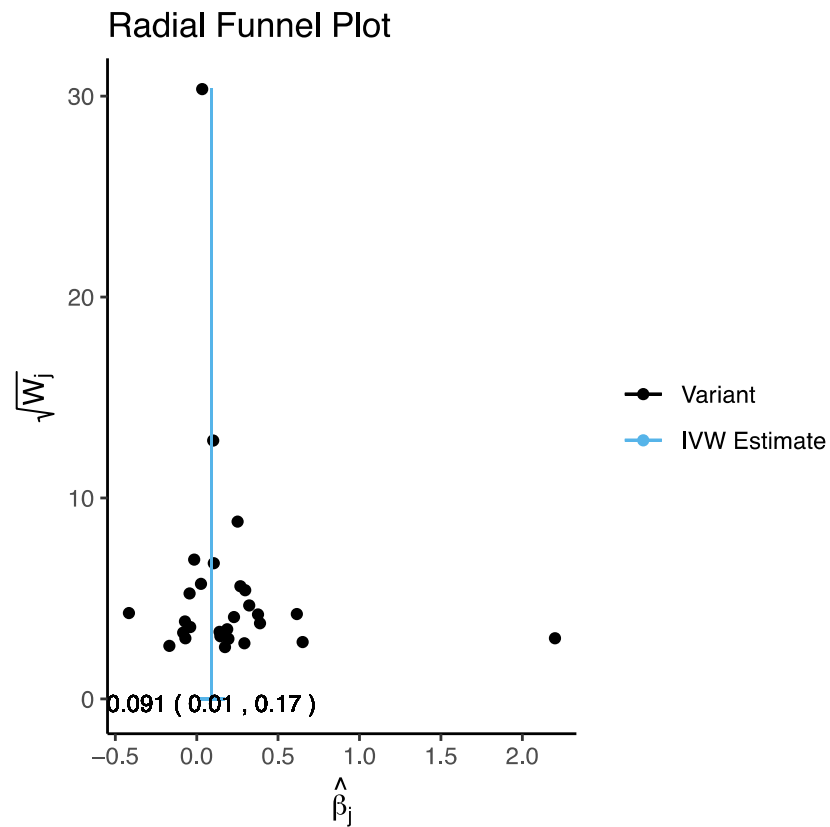

(B)

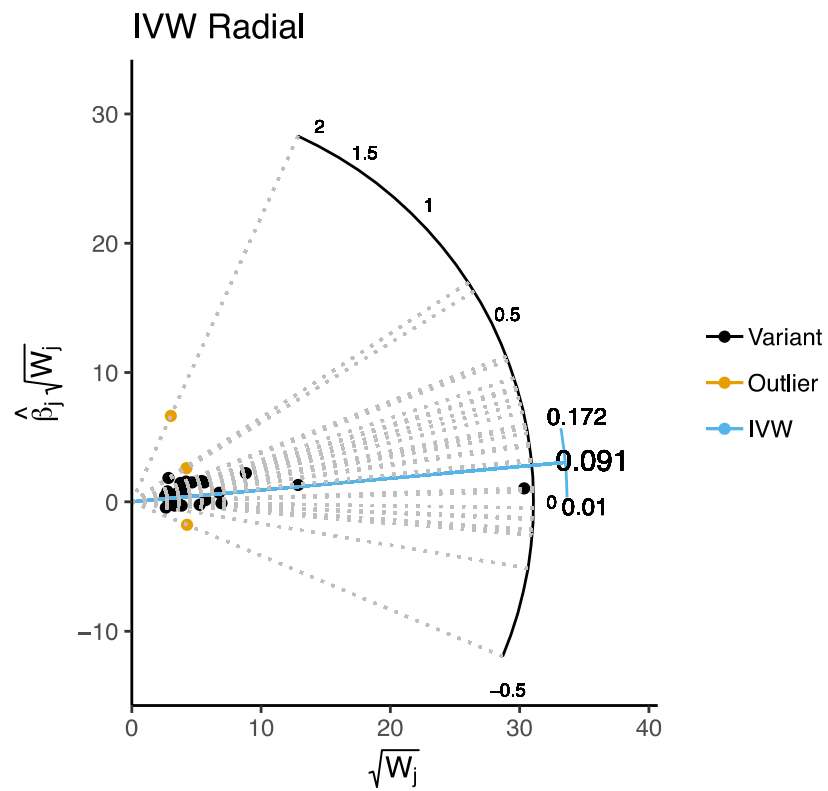

Figure S14. Funnel plot (A) and radial plot (B) for the urate- systolic blood pressure (SBP) relationship.

(A)

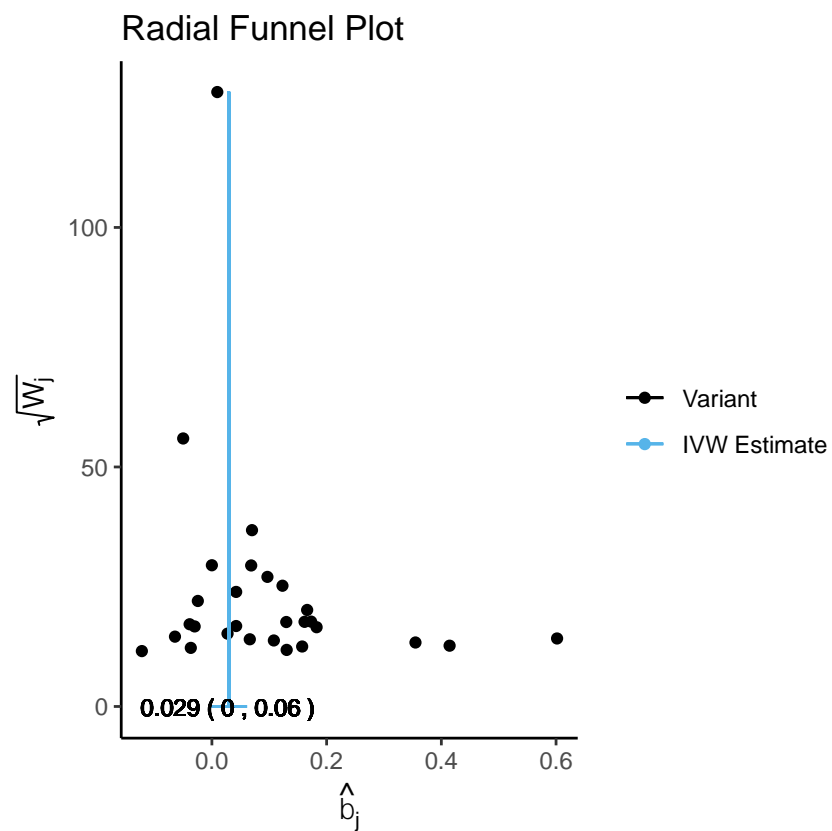

(B)

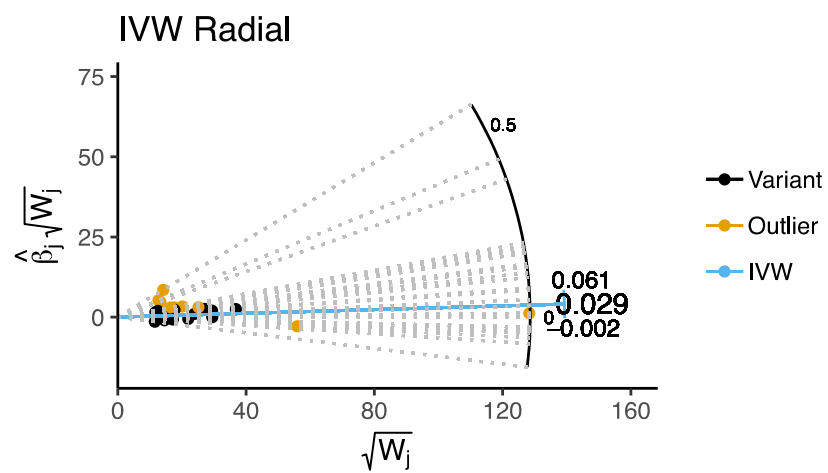

Figure S15. Funnel plot (A) and radial plot (B) for the urate-any ischemic stroke relationship.

(A)

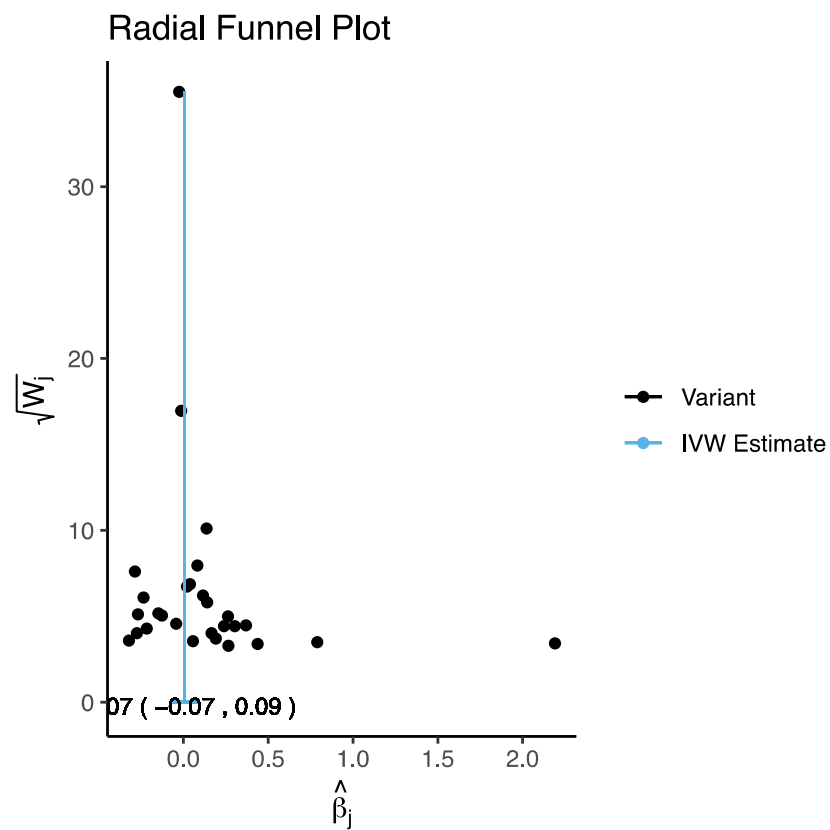

(B)

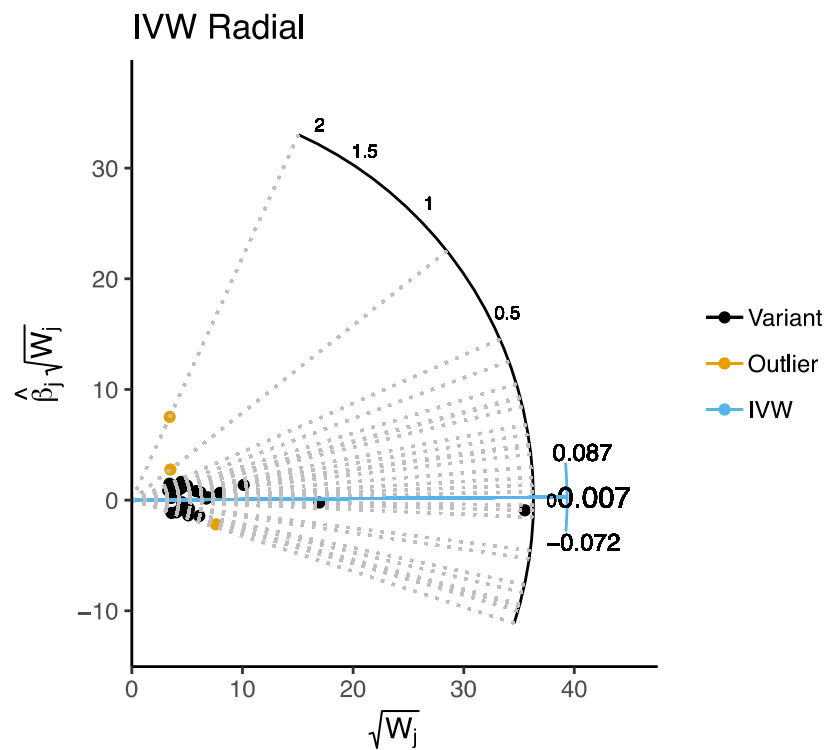



Figure S16. Funnel plot (A) and radial plot (B) for the urate- cardioembolic ischemic stroke (CES) relationship.

(A)

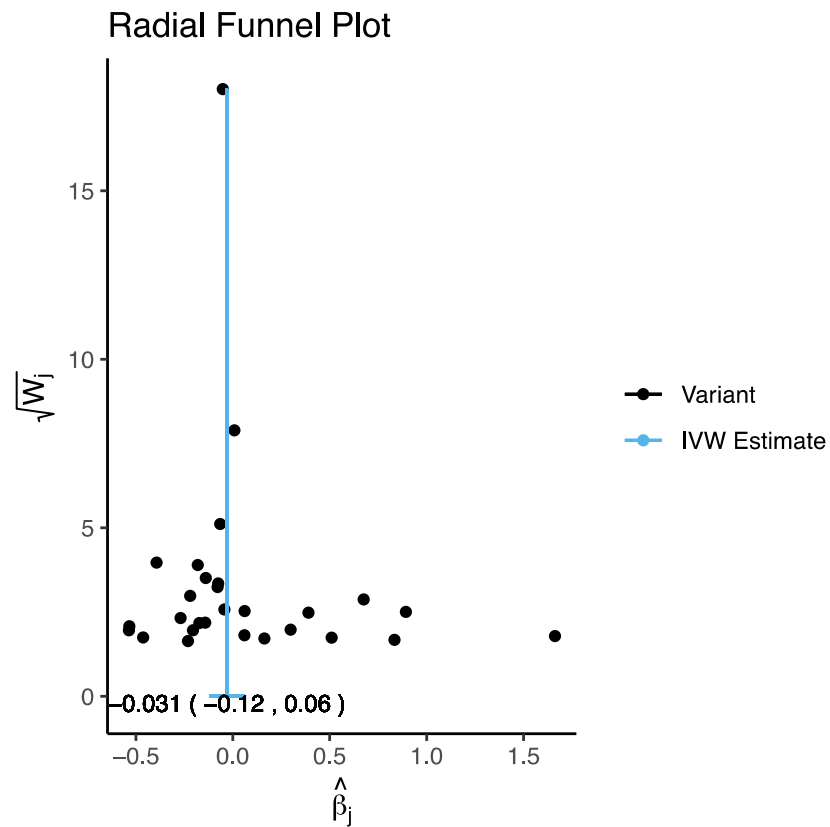

(B)

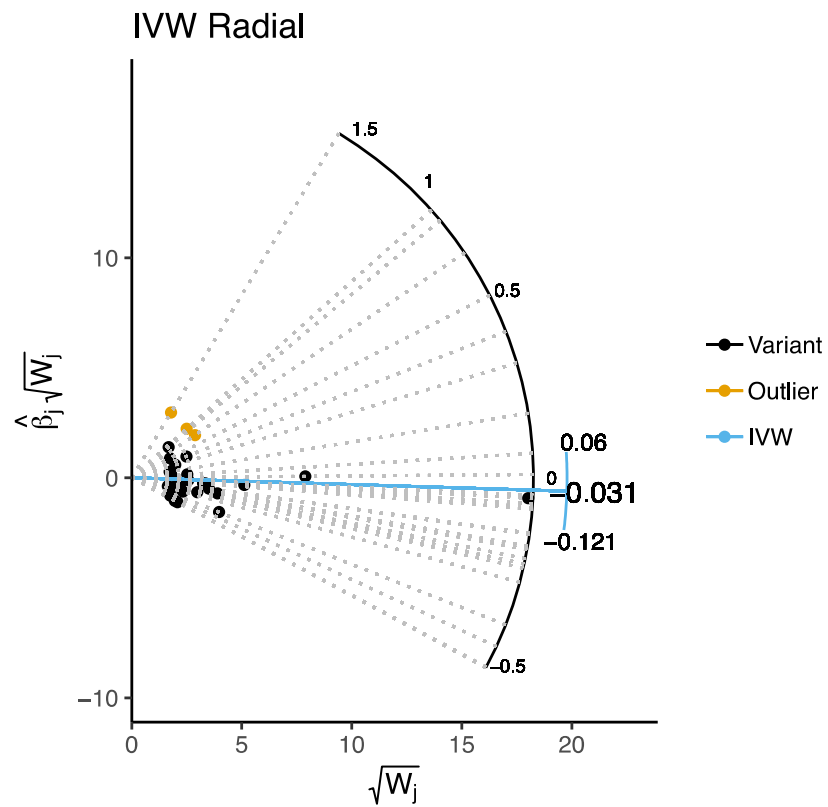

Figure S17. Funnel plot (A) and radial plot (B) for the urate- large-artery atherosclerotic ischemic stroke (LAS) relationship.

(A)

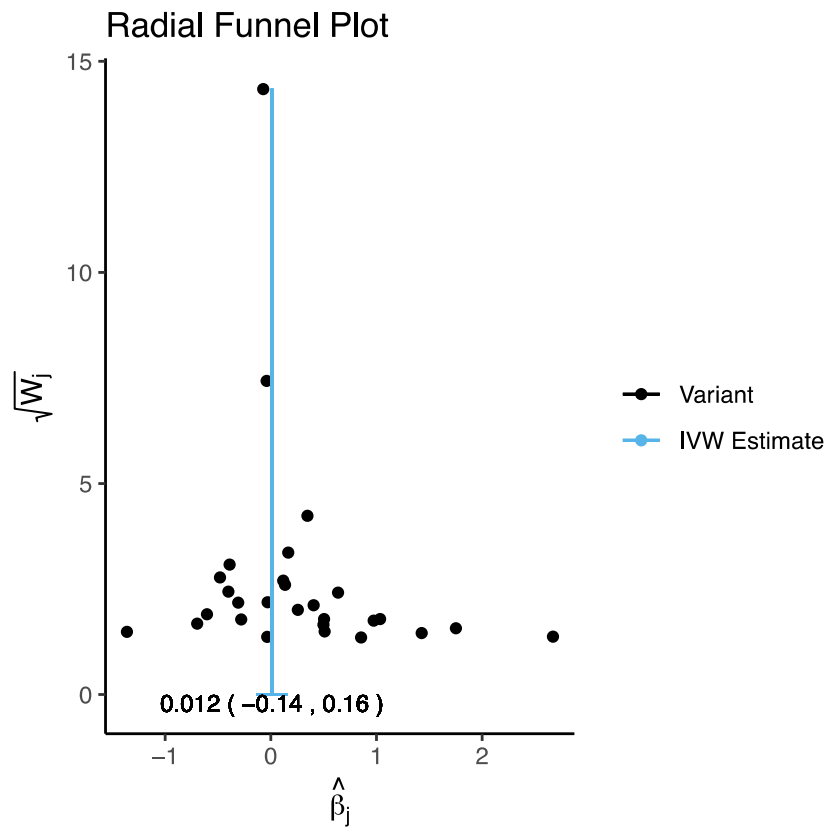

(B)

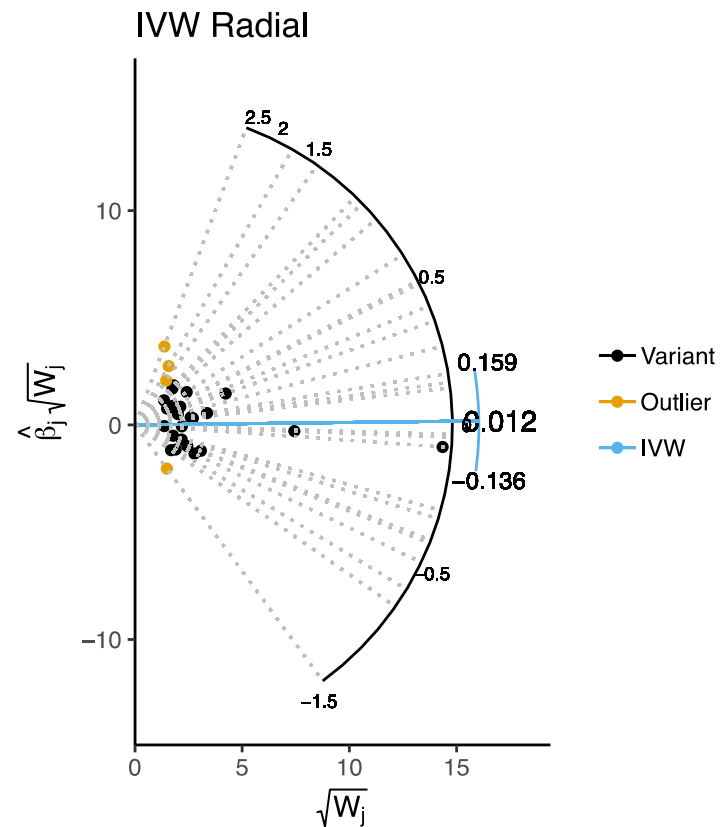

Figure S18. Funnel plot (A) and radial plot (B) for the urate- small-artery ischemic stroke (SVS) relationship.

(A)

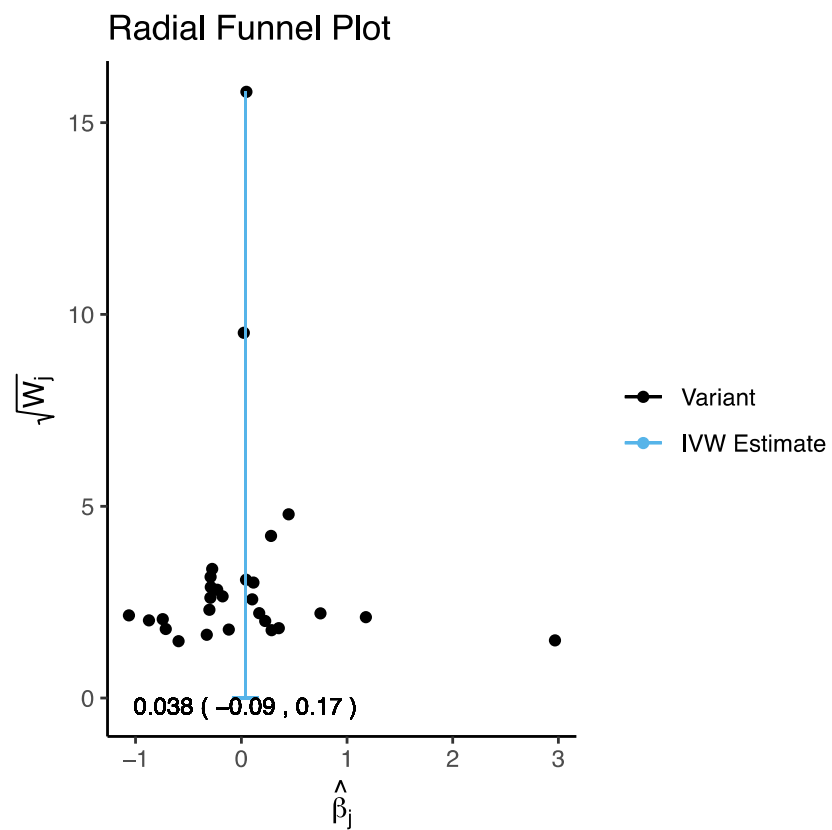

(B)

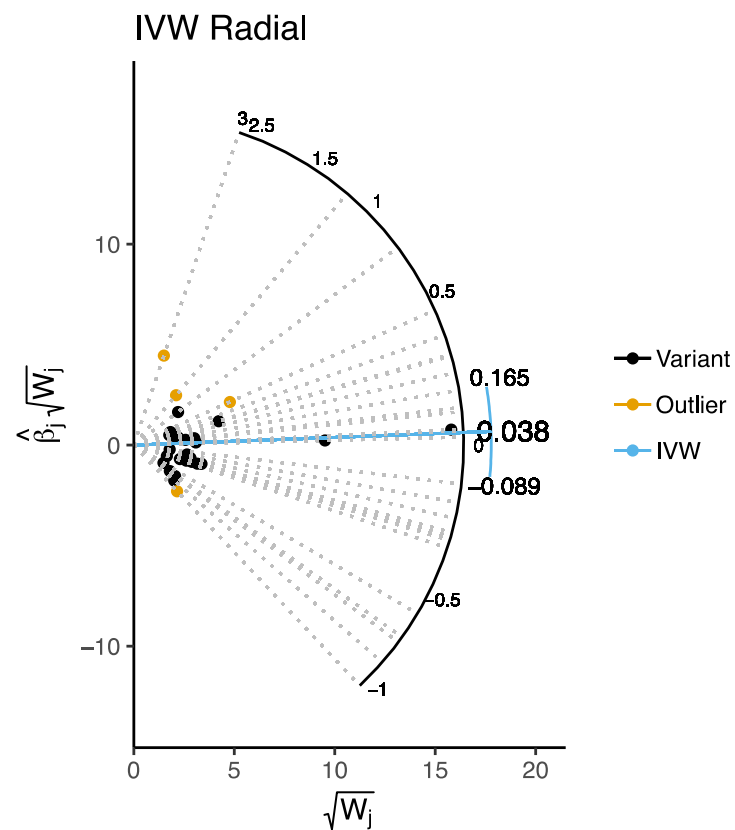

**Figure S19. Forest plot for the association of uric acid with cognitive performance.**

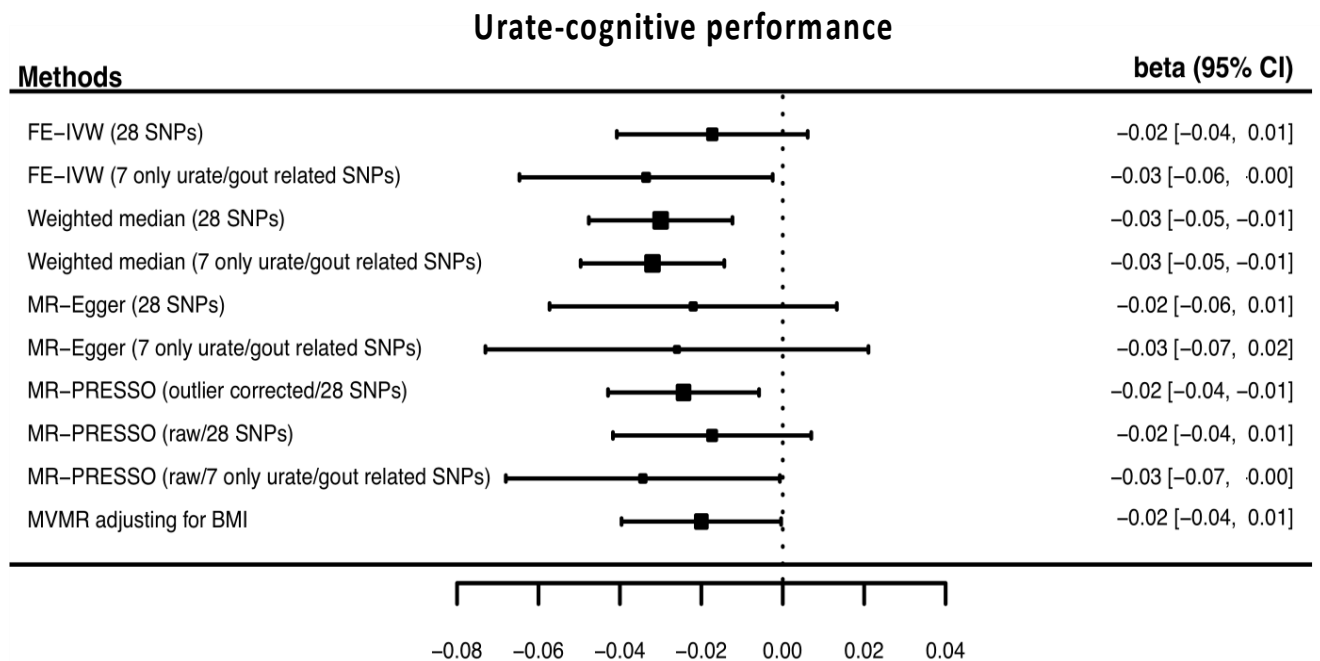

All methods performed in this study are included. Each box indicates the effect estimate (beta) calculated by each method with horizontal lines represent the 95% confidence interval (CI) of this estimate.

**Figure S20. Forest plot for the association of uric acid with Alzheimer’s disease.**

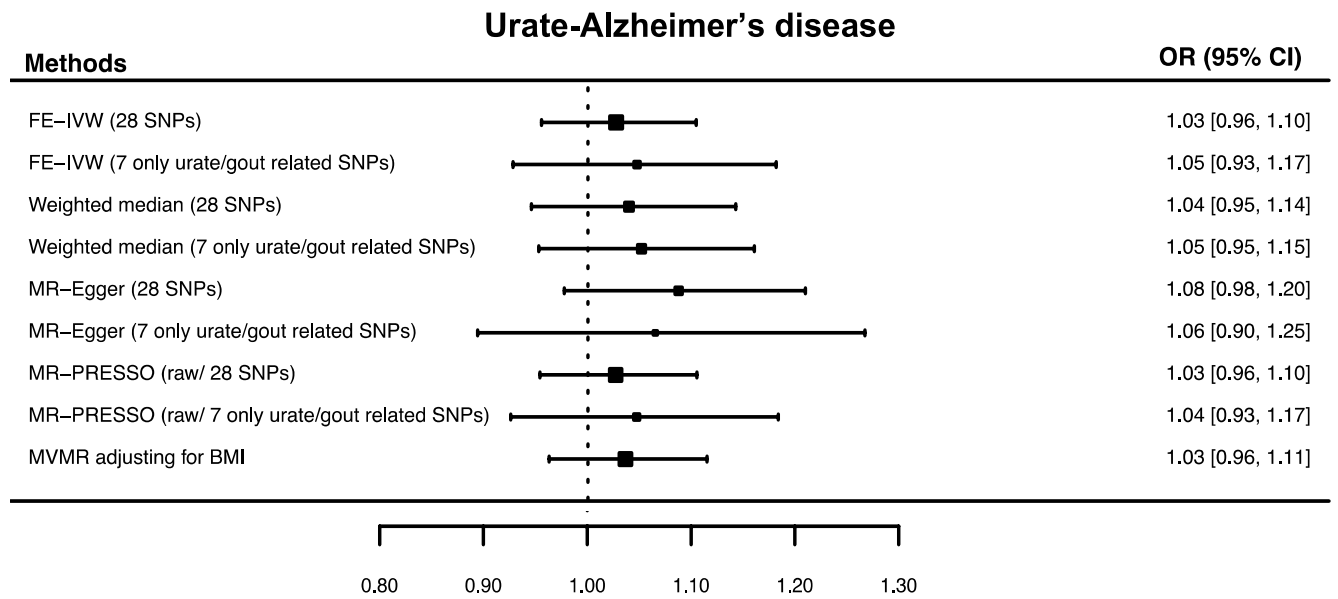

All methods performed in this study are included. Each box indicates the effect estimate (odds ratio [OR]) calculated by each method with horizontal lines represent the 95% confidence interval (CI) of this estimate.

**Figure S21. Forest plots for the association of uric acid with coronary heart disease (CHD), myocardial infarction (MI).**

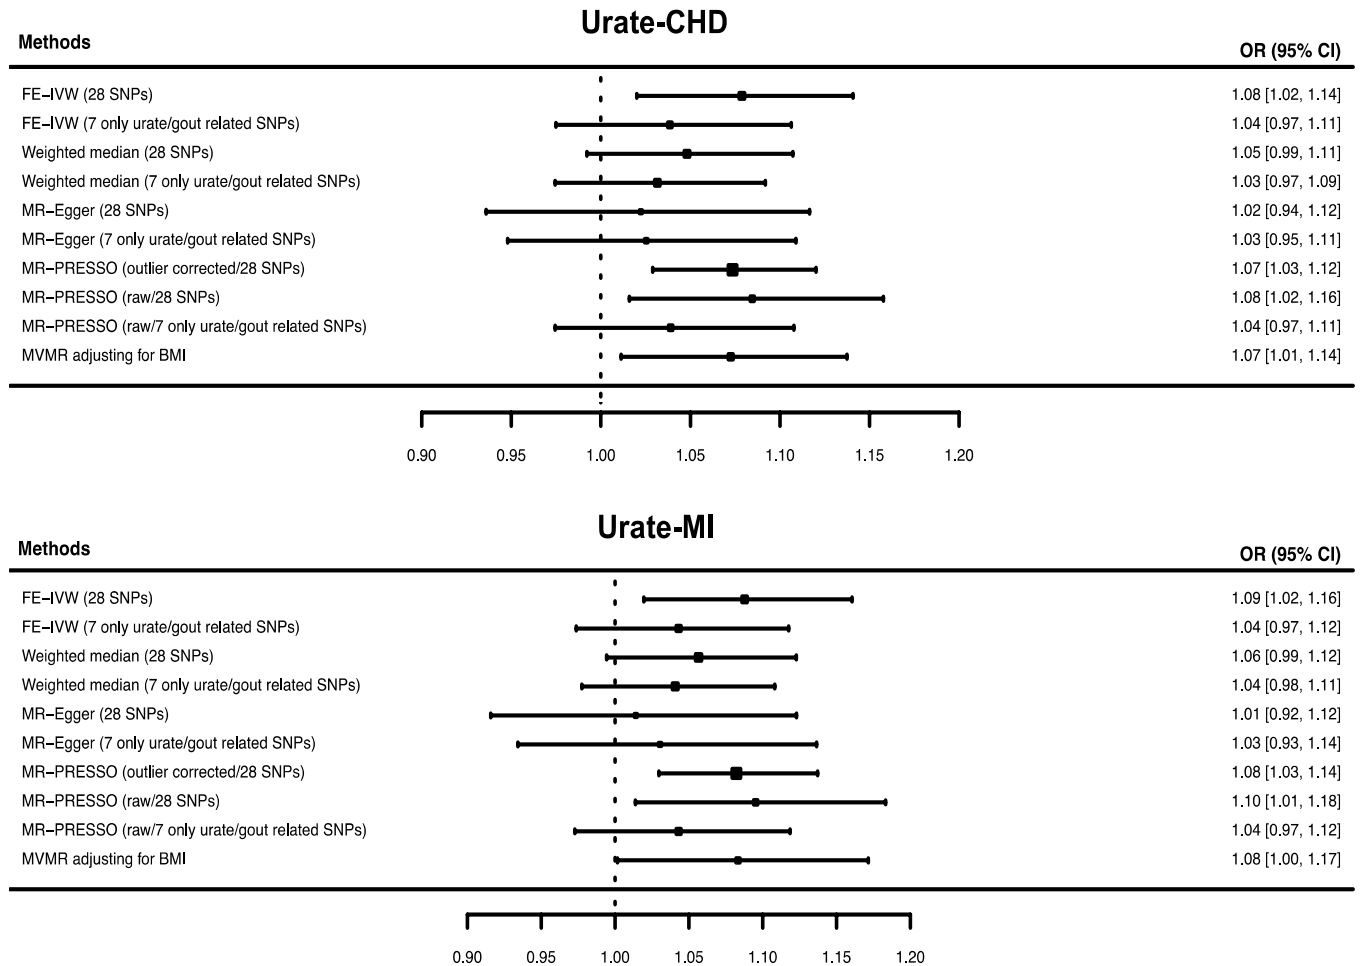

All methods performed in this study are included. Each box indicates the effect estimate (odds ratio [OR]) calculated by each method with horizontal lines represent the 95% confidence interval (CI) of this estimate.

**Figure S22. Forest plot for the association of uric acid with systolic blood pressure (SBP).**

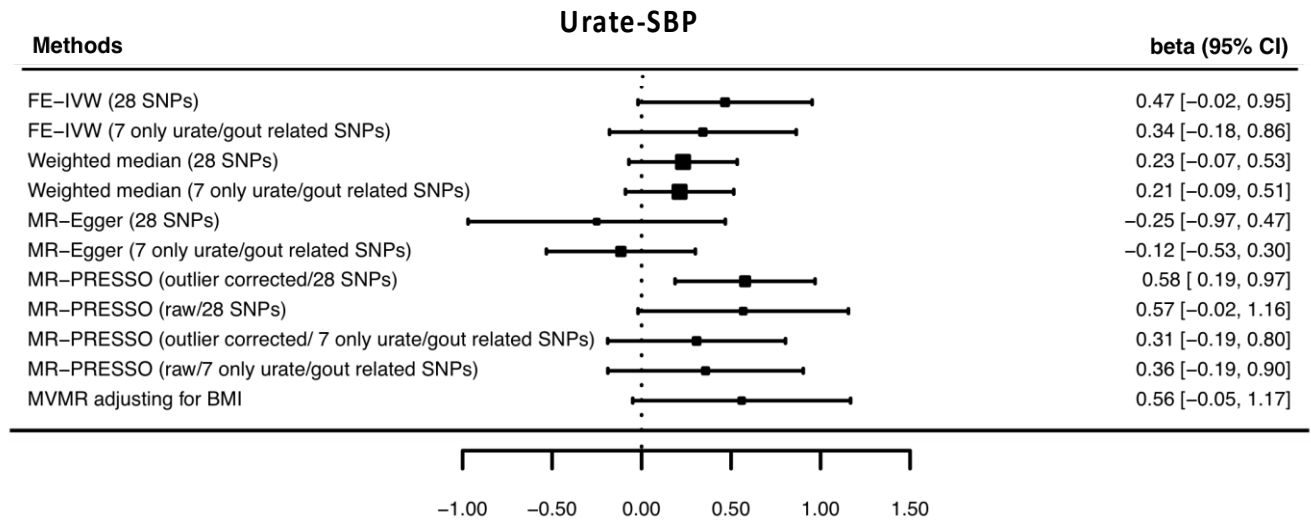

All methods performed in this study are included. Each box indicates the effect estimate (beta) calculated by each method with horizontal lines represent the 95% confidence interval (CI) of this estimate.

**Figure S23. Forest plots for the association of uric acid with ischemic stroke (any type) and its subtypes (cardioembolic stroke [CES], stroke caused by small-vessel disease (small-vessel stroke [SVS]) and large-artery atherosclerotic stroke [LAS]).**

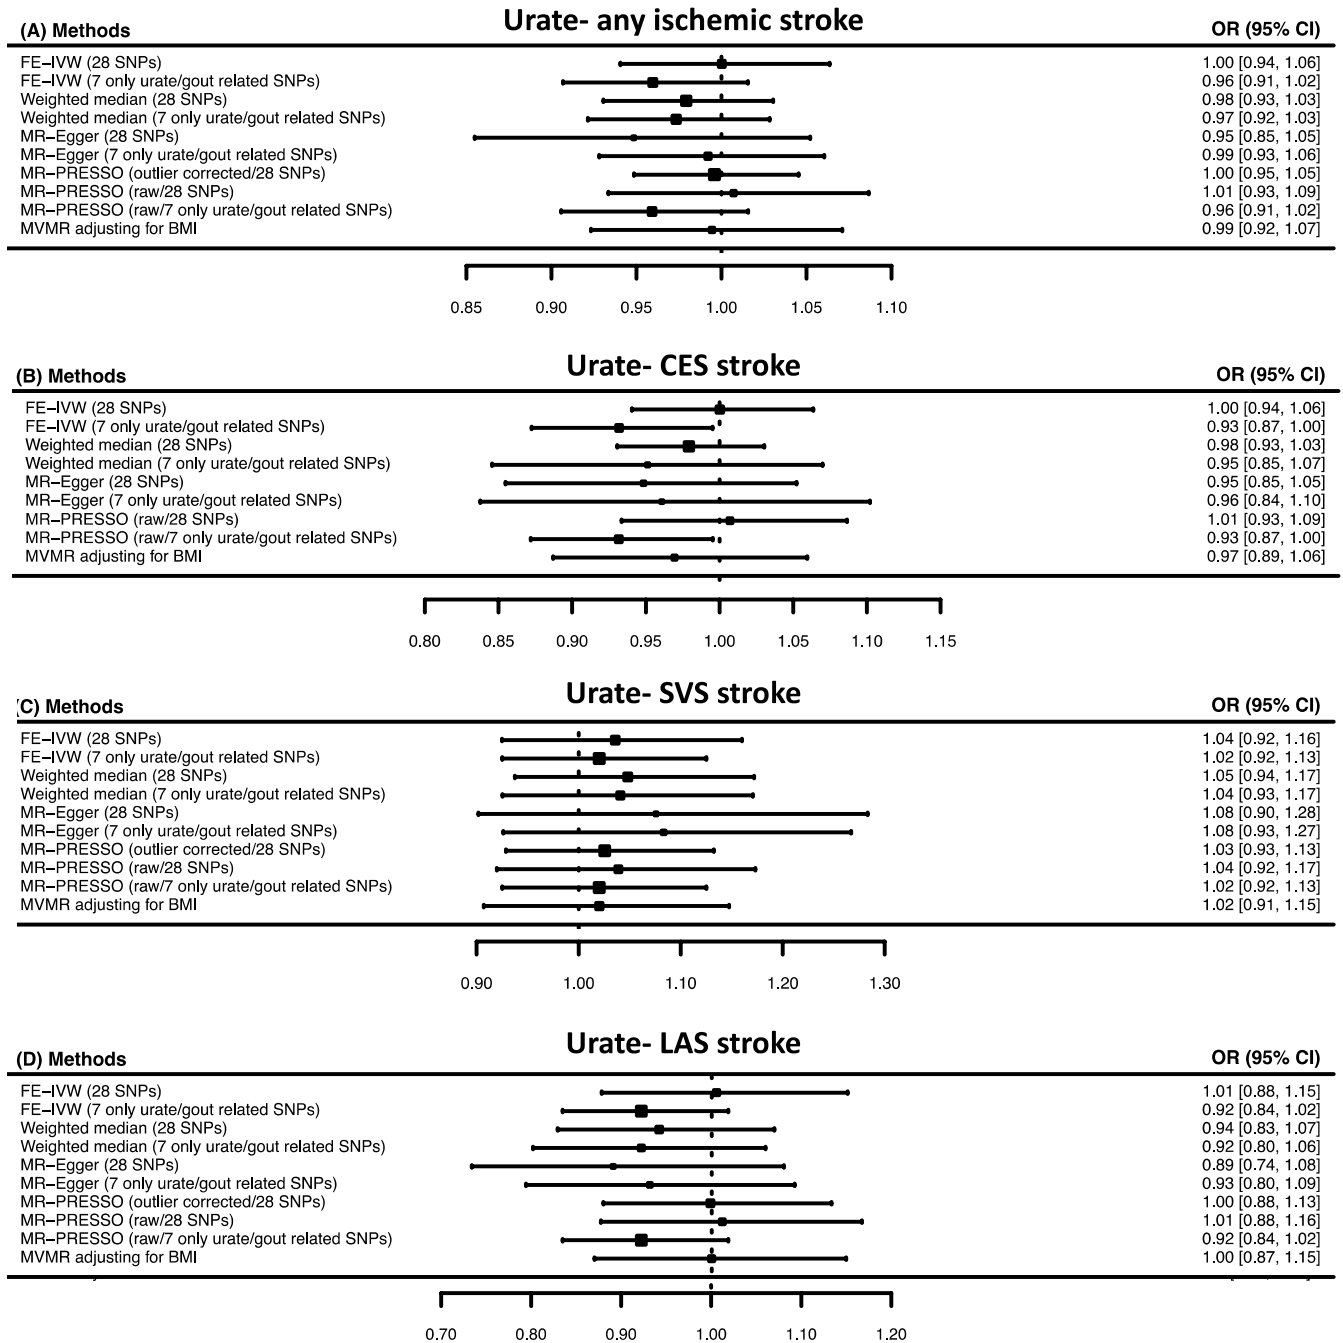

All methods performed in this study are included. Each box indicates the effect estimate (odds ratio [OR]) calculated by each method with horizontal lines represent the 95% confidence interval (CI) of this estimate.



## Supplemental References:

1. Köttgen A, Albrecht E, Teumer A, Vitart V, Krumsiek J, Hundertmark C, Pistis G, Ruggiero D, O'Seaghdha CM, Haller T, Yang Q, Tanaka T, Johnson AD, Kutalik Z, Smith AV, Shi J, Struchalin M, Middelberg RP, Brown MJ, Gaffo AL, Pirastu N, Li G, Hayward C, Zemunik T, Huffman J, Yengo L, Zhao JH, Demirkan A, Feitosa MF, Liu X, Malerba G, Lopez LM, van der Harst P, Li X, Kleber ME, Hicks AA, Nolte IM, Johansson A, Murgia F, Wild SH, Bakker SJ, Peden JF, Dehghan A, Steri M, Tenesa A, Lagou V, Salo P, Mangino M, Rose LM, Lehtimäki T, Woodward OM, Okada Y, Tin A, Müller C, Oldmeadow C, Putku M, Czamara D, Kraft P, Frogger L, Thun GA, Grotevendt A, Gislason GK, Harris TB, Launer LJ, McArdle P, Shuldiner AR, Boerwinkle E, Coresh J, Schmidt H, Schallert M, Martin NG, Montgomery GW, Kubo M, Nakamura Y, Tanaka T, Munroe PB, Samani NJ, Jacobs DR Jr, Liu K, D'Adamo P, Ulivi S, Rotter JI, Psaty BM, Vollenweider P, Waeber G, Campbell S, Devuyst O, Navarro P, Kolcic I, Hastie N, Balkau B, Froguel P, Esko T, Salumets A, Khaw KT, Langenberg C, Wareham NJ, Isaacs A, Kraja A, Zhang Q, Wild PS, Scott RJ, Holliday EG, Org E, Viigimaa M, Bandinelli S, Metter JE, Lupo A, Trabetti E, Sorice R, Döring A, Lattka E, Strauch K, Theis F, Waldenberger M, Wichmann HE, Davies G, Gow AJ, Bruinenberg M; LifeLines Cohort Study, Stolk RP, Kooner JS, Zhang W, Winkelmann BR, Boehm BO, Lucae S, Penninx BW, Smit JH, Curhan G, Mudgal P, Plenge RM, Portas L, Persico I, Kirin M, Wilson JF, Mateo Leach I, van Gilst WH, Goel A, Ongen H, Hofman A, Rivadeneira F, Uitterlinden AG, Imboden M, von Eckardstein A, Cucca F, Nagaraja R, Piras MG, Nauck M, Schurmann C, Budde K, Ernst F, Farrington SM, Theodoratou E, Prokopenko I, Stumvoll M, Jula A, Perola M, Salomaa V, Shin SY, Spector TD, Sala C, Ridker PM, Kähönen M, Viikari J, Hengstenberg C, Nelson CP; CARDIoGRAM Consortium; DIAGRAM Consortium; ICBP Consortium; MAGIC Consortium, Meschia JF, Nalls MA, Sharma P, Singleton AB, Kamatani N, Zeller T, Burnier M, Attia J, Laan M, Klopp N, Hillege HL, Kloiber S, Choi H, Pirastu M, Tore S, Probst-Hensch NM, Völzke H, Gudnason V, Parsa A, Schmidt R, Whitfield JB, Fornage M, Gasparini P, Siscovick DS, Polašek O, Campbell H, Rudan I, Bouatia-Naji N, Metspalu A, Loos RJ, van Duijn CM, Borecki IB, Ferrucci L, Gambaro G, Deary IJ, Wolfenbutter BH, Chambers JC, März W, Pramstaller PP, Snieder H, Gyllenstein U, Wright AF, Navis G, Watkins H, Witteman JC, Sanna S, Schipf S, Dunlop MG, Tönjes A, Ripatti S, Soranzo N, Toniolo D, Chasman DI, Raitakari O, Kao WH, Ciullo M, Fox CS, Caulfield M, Bochud M, Gieger C. Genome-wide association analyses identify 18 new loci associated with serum urate concentrations. *Nat Genet.* 2013; 45:145–54.
2. Palmer TM, Lawlor DA, Harbord RM, Sheehan NA, Tobias JH, Timpson NJ, Davey Smith G, Sterne J. Using multiple genetic variants as instrumental variables for modifiable risk factors. *Stat Methods Med Res.* 2012; 21:223–42.
3. Teslovich TM, Musunuru K, Smith AV, Edmondson AC, Stylianou IM, Koseki M, Pirruccello JP, Ripatti S, Chasman DI, Willer CJ, Johansen CT, Fouchier SW, Isaacs A, Peloso GM, Barbalic M, Ricketts SL, Bis JC, Aulchenko YS, Thorleifsson G, Feitosa MF, Chambers J, Orho-Melander M, Melander O, Johnson T, Li X, Guo X, Li M, Shin Cho Y, Jin Go M, Jin Kim Y, Lee JY, Park T, Kim K, Sim X, Twee-Hee Ong R, Croteau-Chonka DC, Lange LA, Smith JD,

- Song K, Hua Zhao J, Yuan X, Luan J, Lamina C, Ziegler A, Zhang W, Zee RY, Wright AF, Witteman JC, Wilson JF, Willemsen G, Wichmann HE, Whitfield JB, Waterworth DM, Wareham NJ, Waeber G, Vollenweider P, Voight BF, Vitart V, Uitterlinden AG, Uda M, Tuomilehto J, Thompson JR, Tanaka T, Surakka I, Stringham HM, Spector TD, Soranzo N, Smit JH, Sinisalo J, Silander K, Sijbrands EJ, Scuteri A, Scott J, Schlessinger D, Sanna S, Salomaa V, Saharinen J, Sabatti C, Ruukonen A, Rudan I, Rose LM, Roberts R, Rieder M, Psaty BM, Pramstaller PP, Pichler I, Perola M, Penninx BW, Pedersen NL, Pattaro C, Parker AN, Pare G, Oostra BA, O'Donnell CJ, Nieminen MS, Nickerson DA, Montgomery GW, Meitinger T, McPherson R, McCarthy MI, McArdle W, Masson D, Martin NG, Marroni F, Mangino M, Magnusson PK, Lucas G, Luben R, Loos RJ, Lokki ML, Lettre G, Langenberg C, Launer LJ, Lakatta EG, Laaksonen R, Kyvik KO, Kronenberg F, König IR, Khaw KT, Kaprio J, Kaplan LM, Johansson A, Jarvelin MR, Janssens AC, Ingelsson E, Igl W, Kees Hovingh G, Hottenga JJ, Hofman A, Hicks AA, Hengstenberg C, Heid IM, Hayward C, Havulinna AS, Hastie ND, Harris TB, Haritunians T, Hall AS, Gyllenstein U, Guiducci C, Groop LC, Gonzalez E, Gieger C, Freimer NB, Ferrucci L, Erdmann J, Elliott P, Ejebe KG, Döring A, Dominiczak AF, Demissie S, Deloukas P, de Geus EJ, de Faire U, Crawford G, Collins FS, Chen YD, Caulfield MJ, Campbell H, Burt NP, Bonnycastle LL, Boomsma DI, Boekholdt SM, Bergman RN, Barroso I, Bandinelli S, Ballantyne CM, Assimes TL, Quertermous T, Altshuler D, Seielstad M, Wong TY, Tai ES, Feranil AB, Kuzawa CW, Adair LS, Taylor HA Jr, Borecki IB, Gabriel SB, Wilson JG, Holm H, Thorsteinsdottir U, Gudnason V, Krauss RM, Mohlke KL, Ordovas JM, Munroe PB, Kooner JS, Tall AR, Hegele RA, Kastelein JJ, Schadt EE, Rotter JI, Boerwinkle E, Strachan DP, Mooser V, Stefansson K, Reilly MP, Samani NJ, Schunkert H, Cupples LA, Sandhu MS, Ridker PM, Rader DJ, van Duijn CM, Peltonen L, Abecasis GR, Boehnke M, Kathiresan S. Biological, clinical and population relevance of 95 loci for blood lipids. *Nature*. 2010; 466:707–13.
4. Staley JR, Blackshaw J, Kamat MA, Ellis S, Surendran P, Sun BB, Paul DS, Freitag D, Burgess S, Danesh J, Young R, Butterworth AS. PhenoScanner: a database of human genotype–phenotype associations. *Bioinformatics*. 2016; 32:3207–9.
  5. Brion M-JA, Shakhbazov K, Visscher PM. Calculating statistical power in Mendelian randomization studies. *Int J Epidemiol*. 2013; 42:1497–501.
  6. Nikpay M, Goel A, Won H-H, Hall LM, Willenborg C, Kanoni S, Saleheen D, Kyriakou T, Nelson CP, Hopewell JC, Webb TR, Zeng L, Dehghan A, Alver M, Armasu SM, Auro K, Bjornes A, Chasman DI, Chen S, Ford I, Franceschini N, Gieger C, Grace C, Gustafsson S, Huang J, Hwang SJ, Kim YK, Kleber ME, Lau KW, Lu X, Lu Y, Lyytikäinen LP, Mihailov E, Morrison AC, Pervjakova N, Qu L, Rose LM, Salfati E, Saxena R, Scholz M, Smith AV, Tikkanen E, Uitterlinden A, Yang X, Zhang W, Zhao W, de Andrade M, de Vries PS, van Zuydam NR, Anand SS, Bertram L, Beutner F, Dedoussis G, Frossard P, Gauguier D, Goodall AH, Gottesman O, Haber M, Han BG, Huang J, Jalilzadeh S, Kessler T, König IR, Lannfelt L, Lieb W, Lind L, Lindgren CM, Lokki ML, Magnusson PK, Mallick NH, Mehra N, Meitinger T, Memon FU, Morris AP, Nieminen MS, Pedersen NL, Peters A, Rallidis LS, Rasheed A, Samuel M, Shah SH, Sinisalo J, Stirrups KE, Trompet S, Wang L, Zaman KS, Ardisino D, Boerwinkle E, Borecki IB, Bottinger EP, Buring JE, Chambers JC,

- Collins R, Cupples LA, Danesh J, Demuth I, Elosua R, Epstein SE, Esko T, Feitosa MF, Franco OH, Franzosi MG, Granger CB, Gu D, Gudnason V, Hall AS, Hamsten A, Harris TB, Hazen SL, Hengstenberg C, Hofman A, Ingelsson E, Iribarren C, Jukema JW, Karhunen PJ, Kim BJ, Kooner JS, Kullo IJ, Lehtimäki T, Loos RJF, Melander O, Metspalu A, März W, Palmer CN, Perola M, Quertermous T, Rader DJ, Ridker PM, Ripatti S, Roberts R, Salomaa V, Sanghera DK, Schwartz SM, Seedorf U, Stewart AF, Stott DJ, Thiery J, Zalloua PA, O'Donnell CJ, Reilly MP, Assimes TL, Thompson JR, Erdmann J, Clarke R, Watkins H, Kathiresan S, McPherson R, Deloukas P, Schunkert H, Samani NJ, Farrall M. A comprehensive 1000 Genomes–based genome-wide association meta-analysis of coronary artery disease. *Nat Genet.* 2015; 47:1121–30.
7. Lee JJ, Wedow R, Okbay A, Kong E, Maghziyan O, Zacher M, Nguyen-Viet TA, Bowers P, Sidorenko J, Karlsson Linnér R, Fontana MA, Kundu T, Lee C, Li H, Li R, Royer R, Timshel PN, Walters RK, Willoughby EA, Yengo L; 23andMe Research Team; COGENT (Cognitive Genomics Consortium); Social Science Genetic Association Consortium, Alver M, Bao Y, Clark DW, Day FR, Furlotte NA, Joshi PK, Kemper KE, Kleinman A, Langenberg C, Mägi R, Trampush JW, Verma SS, Wu Y, Lam M, Zhao JH, Zheng Z, Boardman JD, Campbell H, Freese J, Harris KM, Hayward C, Herd P, Kumari M, Lencz T, Luan J, Malhotra AK, Metspalu A, Milani L, Ong KK, Perry JRB, Porteous DJ, Ritchie MD, Smart MC, Smith BH, Tung JY, Wareham NJ, Wilson JF, Beauchamp JP, Conley DC, Esko T, Lehrer SF, Magnusson PKE, Oskarsson S, Pers TH, Robinson MR, Thom K, Watson C, Chabris CF, Meyer MN, Laibson DI, Yang J, Johannesson M, Koellinger PD, Turley P, Visscher PM, Benjamin DJ, Cesarini D. Gene discovery and polygenic prediction from a genome-wide association study of educational attainment in 1.1 million individuals. *Nat Genet.* 2018; 50:1112–21.
  8. UK Biobank — Neale lab [Internet]. [cited 2018 Dec 14]. Available from: <http://www.nealelab.is/uk-biobank/>
  9. Lambert J-C, Ibrahim-Verbaas CA, Harold D, Naj AC, Sims R, Bellenguez C, DeStafano AL, Bis JC, Beecham GW, Grenier-Boley B, Russo G, Thornton-Wells TA, Jones N, Smith AV, Chouraki V, Thomas C, Ikram MA, Zelenika D, Vardarajan BN, Kamatani Y, Lin CF, Gerrish A, Schmidt H, Kunkle B, Dunstan ML, Ruiz A, Bihoreau MT, Choi SH, Reitz C, Pasquier F, Cruchaga C, Craig D, Amin N, Berr C, Lopez OL, De Jager PL, Deramecourt V, Johnston JA, Evans D, Lovestone S, Letenneur L, Morón FJ, Rubinsztein DC, Eiriksdottir G, Sleegers K, Goate AM, Fiévet N, Huentelman MW, Gill M, Brown K, Kamboh MI, Keller L, Barberger-Gateau P, McGuinness B, Larson EB, Green R, Myers AJ, Dufouil C, Todd S, Wallon D, Love S, Rogaeva E, Gallacher J, St George-Hyslop P, Clarimon J, Lleo A, Bayer A, Tsuang DW, Yu L, Tsolaki M, Bossù P, Spalletta G, Proitsi P, Collinge J, Sorbi S, Sanchez-Garcia F, Fox NC, Hardy J, Deniz Naranjo MC, Bosco P, Clarke R, Brayne C, Galimberti D, Mancuso M, Matthews F; European Alzheimer's Disease Initiative (EADI); Genetic and Environmental Risk in Alzheimer's Disease; Alzheimer's Disease Genetic Consortium; Cohorts for Heart and Aging Research in Genomic Epidemiology, Moebus S, Mecocci P, Del Zompo M, Maier W, Hampel H, Pilotto A, Bullido M, Panza F, Caffarra P, Nacmias B, Gilbert JR, Mayhaus M, Lannefelt L, Hakonarson H, Pichler S, Carrasquillo MM, Ingelsson M, Beekly D, Alvarez V, Zou F, Valladares O, Younkin SG, Coto E, Hamilton-Nelson KL, Gu W,

- Razquin C, Pastor P, Mateo I, Owen MJ, Faber KM, Jonsson PV, Combarros O, O'Donovan MC, Cantwell LB, Soininen H, Blacker D, Mead S, Mosley TH Jr, Bennett DA, Harris TB, Fratiglioni L, Holmes C, de Bruijn RF, Passmore P, Montine TJ, Bettens K, Rotter JI, Brice A, Morgan K, Foroud TM, Kukull WA, Hannequin D, Powell JF, Nalls MA, Ritchie K, Lunetta KL, Kauwe JS, Boerwinkle E, Riemenschneider M, Boada M, Hiltunen M, Martin ER, Schmidt R, Rujescu D, Wang LS, Dartigues JF, Mayeux R, Tzourio C, Hofman A, Nöthen MM, Graff C, Psaty BM, Jones L, Haines JL, Holmans PA, Lathrop M, Pericak-Vance MA, Launer LJ, Farrer LA, van Duijn CM, Van Broeckhoven C, Moskvina V, Seshadri S, Williams J, Schellenberg GD, Amouyel P. Meta-analysis of 74,046 individuals identifies 11 new susceptibility loci for Alzheimer's disease. *Nat Genet.* 2013; 45:1452–8.
10. Malik R, Chauhan G, Traylor M, Sargurupremraj M, Okada Y, Mishra A, Rutten-Jacobs L, Giese AK, van der Laan SW, Gretarsdottir S, Anderson CD, Chong M, Adams HHH, Ago T, Almgren P, Amouyel P, Ay H, Bartz TM, Benavente OR, Bevan S, Boncoraglio GB, Brown RD Jr, Butterworth AS, Carrera C, Carty CL, Chasman DI, Chen WM, Cole JW, Correa A, Cotlarciuc I, Cruchaga C, Danesh J, de Bakker PIW, DeStefano AL, den Hoed M, Duan Q, Engelter ST, Falcone GJ, Gottesman RF, Grewal RP, Gudnason V, Gustafsson S, Haessler J, Harris TB, Hassan A, Havulinna AS, Heckbert SR, Holliday EG, Howard G, Hsu FC, Hyacinth HI, Ikram MA, Ingelsson E, Irvin MR, Jian X, Jiménez-Conde J, Johnson JA, Jukema JW, Kanai M, Keene KL, Kissela BM, Kleindorfer DO, Kooperberg C, Kubo M, Lange LA, Langefeld CD, Langenberg C, Launer LJ, Lee JM, Lemmens R, Leys D, Lewis CM, Lin WY, Lindgren AG, Lorentzen E, Magnusson PK, Maguire J, Manichaikul A, McArdle PF, Meschia JF, Mitchell BD, Mosley TH, Nalls MA, Ninomiya T, O'Donnell MJ, Psaty BM, Pulit SL, Rannikmäe K, Reiner AP, Rexrode KM, Rice K, Rich SS, Ridker PM, Rost NS, Rothwell PM, Rotter JI, Rundek T, Sacco RL, Sakaue S, Sale MM, Salomaa V, Sapkota BR, Schmidt R, Schmidt CO, Schminke U, Sharma P, Slowik A, Sudlow CLM, Tanislav C, Tatlisumak T, Taylor KD, Thijs VNS, Thorleifsson G, Thorsteinsdottir U, Tiedt S, Trompet S, Tzourio C, van Duijn CM, Walters M, Wareham NJ, Wassertheil-Smoller S, Wilson JG, Wiggins KL, Yang Q, Yusuf S; AFGen Consortium; Cohorts for Heart and Aging Research in Genomic Epidemiology (CHARGE) Consortium; International Genomics of Blood Pressure (iGEN-BP) Consortium; INVENT Consortium; STARNET, Bis JC, Pastinen T, Ruusalepp A, Schadt EE, Koplev S, Björkegren JLM, Codoni V, Civelek M, Smith NL, Trégouët DA, Christophersen IE, Roselli C, Lubitz SA, Ellinor PT, Tai ES, Kooner JS, Kato N, He J, van der Harst P, Elliott P, Chambers JC, Takeuchi F, Johnson AD; BioBank Japan Cooperative Hospital Group; COMPASS Consortium; EPIC-CVD Consortium; EPIC-InterAct Consortium; International Stroke Genetics Consortium (ISGC); METASTROKE Consortium; Neurology Working Group of the CHARGE Consortium; NINDS Stroke Genetics Network (SiGN); UK Young Lacunar DNA Study; MEGASTROKE Consortium, Sanghera DK, Melander O, Jern C, Strbian D, Fernandez-Cadenas I, Longstreth WT Jr, Rolfs A, Hata J, Woo D, Rosand J, Pare G, Hopewell JC, Saleheen D, Stefansson K, Worrall BB, Kittner SJ, Seshadri S, Fornage M, Markus HS, Howson JMM, Kamatani Y, Debette S, Dichgans. Multiancestry genome-wide association study of 520,000 subjects identifies 32 loci associated with stroke and stroke subtypes. *Nat Genet.* 2018; 50:524–37.
